# Supplementary material for: Immunoglobulin G4+ B‐cell receptor clones distinguish immunoglobulin G 4‐related disease from primary sclerosing cholangitis and biliary/pancreatic malignancies
Source: PubMed Central journal article supplement (PMC5017301; doi:10.1002/hep.28568), 2016-06-08
Supplement: HEP-64-501-s001.pdf [file HEP-64-501-s001.pdf]

**Supplementary Figure 1:** Overview of the qPCR-test consisting of 2 separate amplification reactions. Reaction 1 amplifies all possible IgG subtypes through the use of 1 universal forward primer and 1 generic IgG reverse primer. Reaction 2 amplifies IgG4 message specifically using the universal forward primer but another, specific, reverse primer for IgG4.

**Supplementary Figure 2:** The validation of the qPCR-test in (A) the discovery cohort (n=15 IgG4-RD, n=7 PSC and n=8 CA patients), (B) the replication in the Dutch cohort (n=26 IgG4-RD, n=11 PSC and n=19 CA patients) and (C) the British cohort (n=9 IgG4-RD and 30 PSC patients). The red dotted line delineates the test's cut-off value of 5%. \*\*\* p<0.001. (D) IgG4 serum titers in 49 IgG4-RD patients, 48 PSC and 27 CA patients. The red dotted line delineates the upper limit of normal (1.4 g/L), \*\*\* p<0.001. (E) Table showing the sensitivity and specificity (95%-confidence intervals) of the *qPCR-test* in the first test cohort (*discovery cohort*, n=30), the replication in the Amsterdam cohort (*Dutch replication*, n=56), the replication in the British cohort (*British replication*, n=39), and all these 3 cohorts combined (n=125).

**Supplementary Figure 3:** (A) scatterplot showing the IgG+ repertoires in 6 patients suffering from chronic pancreatitis (*CP01-CP06*). Every dot represents a unique IgG+ clone. IgG4+ clones are marked in red. (B) Dotplot showing the percentage specific IgG4 RNA molecules of total IgG RNA molecules, in 40 patients suffering from auto-immune pancreatitis (*AIP*) and 10 chronic pancreatitis patients (*CP*). The red dotted line delineates the cut-off value of 5%, \*\*\* p<0.001.

**Supplementary Figure 4:** Scatter dotplot showing (A) the qPCR-test in IgG4-RD patients split into the 3 HISORt groups (*group A, B and C*), and the control groups (*PSC and CA*). The red dotted line delineates the cut-off for the qPCR-test (5%). (B) serum IgG4 titers in IgG4-RD patients split into the 3 HISORt groups (*group A, B and C*), and the control groups (*PSC and CA*). The red dotted line delineates the upper limit of normal (1.4 g/L).

**Supplementary Figure 5:** Serum biochemical tests before and 4 weeks after high-dose corticosteroids in IgG4-RD. The means of 20 IgG4-RD patients are depicted for alkaline phosphatase (ALP), gamma-glutamyltransferase (GGT), total bilirubin and IgG4 levels (sIgG4). \*  $p < 0.05$ .

**Supplementary Table 1A:** Patient characteristics – *Next-Generation Sequencing*

‡ The group with *IgG4-related disease* consists of patients suffering from IgG4-associated cholangitis (IAC) and/or autoimmune pancreatitis (AIP) according to the HISORt criteria for IAC and AIP. ¶ The group with *malignancies* consists of patients suffering from pathology-proven carcinoma of the biliary tree or pancreas. \*  $n=31$ . #  $n=25$ . IgG4 = immunoglobulin G4, ULN=upper limit of normal.

**Supplementary Table 1B:** Patient characteristics – *qPCR-test*

‡ The group with *IgG4-related disease* consists of patients suffering from IgG4-associated cholangitis (IAC) and/or autoimmune pancreatitis (AIP) according to the

HISORt criteria for IAC and AIP. ¶ The group with *malignancies* consists of patients suffering from pathology-proven carcinoma of the biliary tree or pancreas. \* n=47. # n=39. IgG4 = immunoglobulin G4, ULN=upper limit of normal.

**Supplementary Table 2: Patient characteristics**

Table describing patient characteristics for all cases and controls.

1

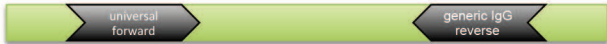

IgG1 – C<sub>H</sub>1  
IgG2 – C<sub>H</sub>1  
IgG3 – C<sub>H</sub>1  
IgG4 – C<sub>H</sub>1

2

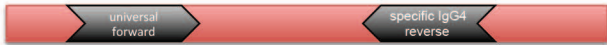

IgG4 – C<sub>H</sub>1

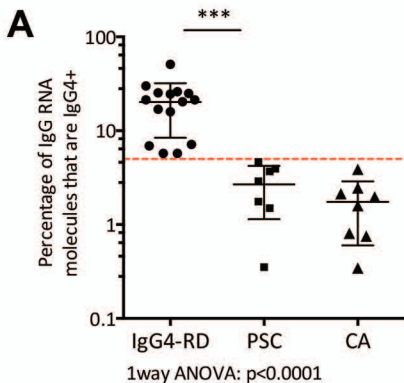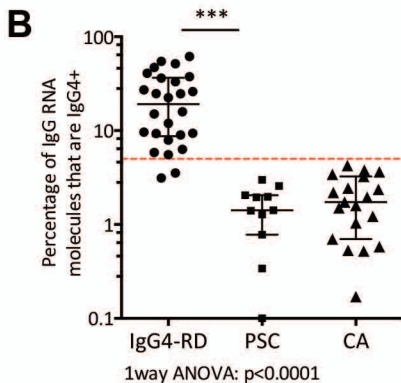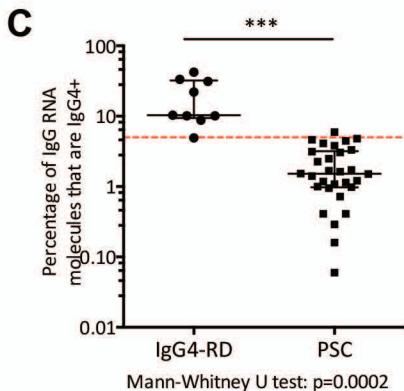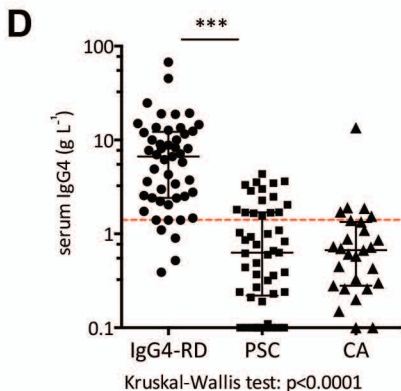

**E**

|                    | discovery cohort<br>(n=30) | Dutch replication<br>(n=56) | British replication<br>(n=39) | combined<br>(n=125) |
|--------------------|----------------------------|-----------------------------|-------------------------------|---------------------|
| <b>Sensitivity</b> | 100% (78.2-100%)           | 92.3% (74.9-99.1%)          | 88.9% (51.8-99.7%)            | 94.0% (83.5-98.8%)  |
| <b>Specificity</b> | 100% (78.2-100%)           | 100% (88.4-100%)            | 96.7% (82.8-99.9%)            | 98.7% (92.8-100%)   |

**A**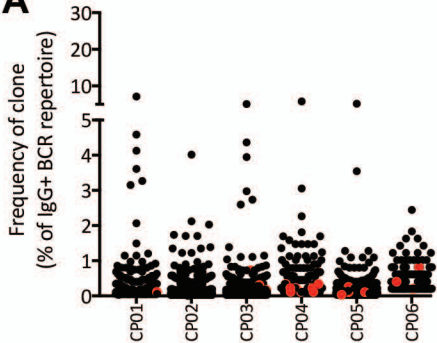**B**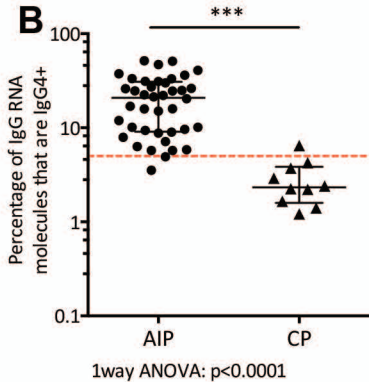

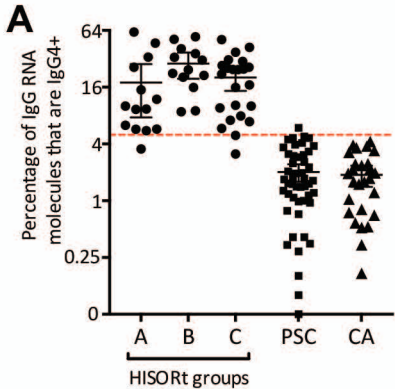

Kruskal-Wallis test:  $p < 0.0001$

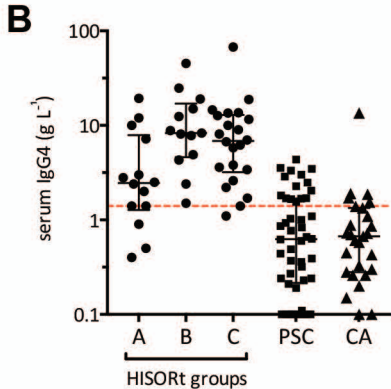

Kruskal-Wallis test:  $p < 0.0001$

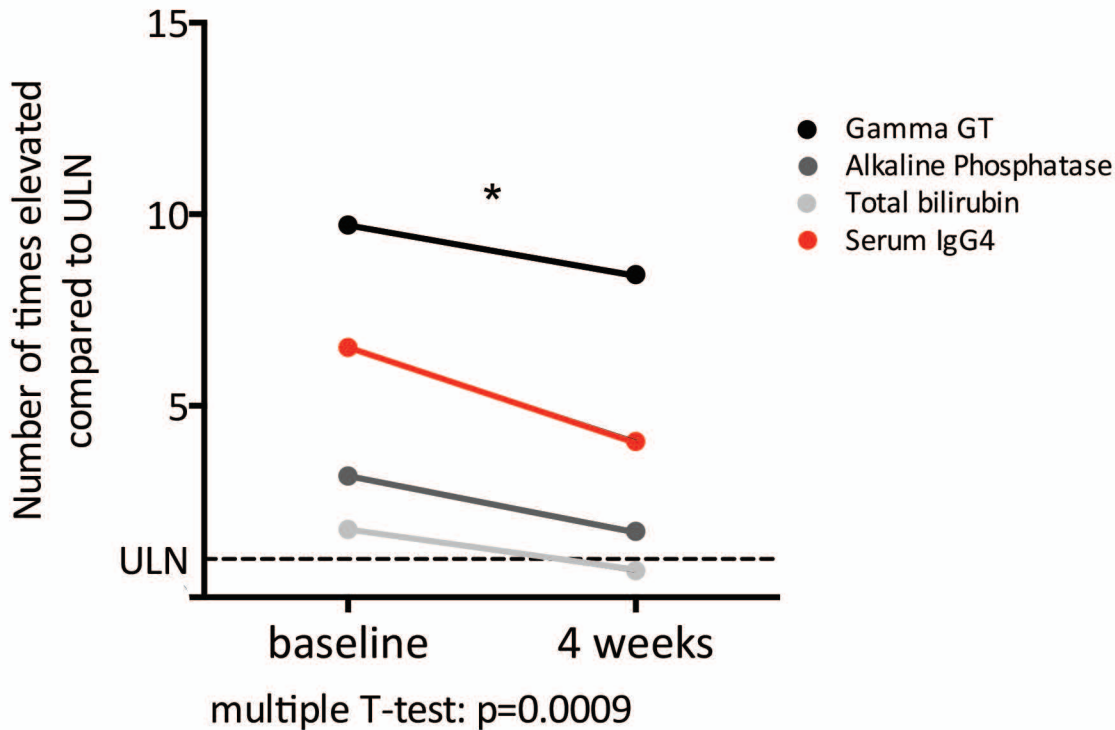



|                                 | IgG4-related disease ‡<br>n=34 |                |                | primary sclerosing cholangitis<br>n=17 | malignancies ¶<br>n=17 | chronic pancreatitis<br>n=6 |
|---------------------------------|--------------------------------|----------------|----------------|----------------------------------------|------------------------|-----------------------------|
|                                 | Group A (n=11)                 | Group B (n=11) | Group C (n=12) |                                        |                        |                             |
| Male sex — no. (%)              | 9 (82)                         | 7 (64)         | 11 (92)        | 11 (65%)                               | 10 (59)                | 4 (67)                      |
| Age — no. years (range)         | 67 (58-80)                     | 67 (53-84)     | 69 (52-82)     | 57 (32-87)                             | 65 (47-78)             | 55 (48-63)                  |
| slgG4 — median (range) *        | 2.2 (0.4-19)                   | 8.3 (1.5-45)   | 6.7 (1.4-67)   | 0.9 (0.05 – 3.3)                       | 0.6 (0 – 1.9)          | 0.7 (0.1 – 1.8)             |
| >1x ULN — no. (%)               | 6 (60)                         | 11 (100)       | 10 (91)        | 5 (29)                                 | 2 (12)                 | 1 (17)                      |
| >2x ULN — no. (%)               | 2 (20)                         | 9 (82)         | 8 (73)         | 1 (6)                                  | 0 (0)                  | 0 (0)                       |
| >4x ULN — no. (%)               | 2 (20)                         | 8 (73)         | 8 (73)         | 0 (0)                                  | 0 (0)                  | 0 (0)                       |
| Response to therapy — no. (%) # | 5 (100)                        | 9 (100)        | 11 (100)       | NA                                     | NA                     | NA                          |

**Supplementary Table 1A: Patient characteristics – Next-Generation Sequencing**

‡ The group with *IgG4-related disease* consists of patients suffering from IgG4-associated cholangitis (IAC) and/or autoimmune pancreatitis (AIP) according to the HISORT criteria for IAC and AIP. ¶ The group with *malignancies* consists of patients suffering from pathology-proven carcinoma of the biliary tree or pancreas.

\* n=31. # n=25. IgG4 = immunoglobulin G4, slgG4 = serum IgG4 titer, ULN=upper limit of normal.

|                                 | IgG4-related disease ‡<br>n=50 |                |                | primary sclerosing cholangitis<br>n=48 | malignancies ¶<br>n=27 | chronic pancreatitis<br>n=10 |
|---------------------------------|--------------------------------|----------------|----------------|----------------------------------------|------------------------|------------------------------|
|                                 | Group A (n=15)                 | Group B (n=13) | Group C (n=22) |                                        |                        |                              |
| Male sex — no. (%)              | 13 (87)                        | 9 (69)         | 21 (96)        | 30 (63)                                | 16 (57)                | 6 (60)                       |
| Age — no. years (IQR)           | 65 (49-80)                     | 66 (53-84)     | 68 (42-82)     | 53 (25-87)                             | 64 (47-78)             | 54 (46-68)                   |
| slgG4 — median (range) *        | 2.5 (0.4-19)                   | 8.1 (1.5-45)   | 7.5 (1.1-67)   | 0.6 (0.01 – 4.4)                       | 0.6 (0 – 14)           | 0.7 (0.1 – 1.8)              |
| >1x ULN — no. (%)               | 9 (64)                         | 13 (100)       | 18 (90)        | 15 (31)                                | 5 (18)                 | 1 (10)                       |
| >2x ULN — no. (%)               | 4 (29)                         | 11 (85)        | 16 (80)        | 6 (13)                                 | 1 (4)                  | 0 (0)                        |
| >4x ULN — no. (%)               | 3 (21)                         | 8 (62)         | 14 (70)        | 0 (0)                                  | 1 (4)                  | 0 (0)                        |
| Response to therapy — no. (%) # | 6 (100)                        | 11 (100)       | 22 (100)       | NA                                     | NA                     | NA                           |

**Supplementary Table 1B: Patient characteristics – qPCR-test**

‡ The group with *IgG4-related disease* consists of patients suffering from IgG4-associated cholangitis (IAC) and/or autoimmune pancreatitis (AIP) according to the HISORT criteria for IAC and AIP. ¶ The group with *malignancies* consists of patients suffering from pathology-proven carcinoma of the biliary tree or pancreas.

\* n=47. # n=39. IgG4 = immunoglobulin G4, slgG4 = serum IgG4 titer, ULN=upper limit of normal.

**IgG4+ B-Cell Receptor Clones Distinguish IgG4-Related Disease (IRD) from  
Primary Sclerosing Cholangitis and Pancreaticobiliary Malignancies**

*Marieke E. Doorenspleet*<sup>1,2\*</sup>, *Lowiek M. Hubers*<sup>3\*</sup>, Emma L. Culver<sup>4,5</sup>, Lucas J. Maillette de Buy Wenniger<sup>3,#</sup>,  
Paul L. Klarenbeek<sup>1,2</sup>, Roger W. Chapman<sup>4,5</sup>, Frank Baas<sup>2</sup>, Stan F.J. van de Graaf<sup>3</sup>, Joanne Verheij<sup>6</sup>,  
Thomas M. van Gulik<sup>7</sup>, Eleanor Barnes<sup>4,5</sup>, *Ulrich Beuers*<sup>3\*</sup>, *Niek de Vries*<sup>1\*</sup>

*\* These authors contributed equally*

<sup>1</sup>Amsterdam Rheumatology and immunology Center, Department of Clinical Immunology & Rheumatology, Academic Medical Center, Amsterdam, The Netherlands, <sup>2</sup>Dept of Genome Analysis, Academic Medical Center, Amsterdam, The Netherlands, <sup>3</sup>Dept of Gastroenterology & Hepatology and Tytgat Institute for Liver and Intestinal Research, Academic Medical Center, Amsterdam, The Netherlands, <sup>4</sup>Translational Gastroenterology Unit, John Radcliffe Hospital, Oxford, United Kingdom, <sup>5</sup>NDM Oxford University, Oxford Martin School, Oxford University, Oxford, United Kingdom <sup>6</sup>Dept of Pathology, Academic Medical Center, Amsterdam, The Netherlands <sup>7</sup>Dept of Surgery, Academic Medical Center, Amsterdam, The Netherlands # currently: Dept of Ophthalmology, VU medical center, Amsterdam

**SUPPORTING DOCUMENT: SUPPLEMENTARY TABLE 2**

## Patient characteristics – IRD patients

| ID    | GENERAL |       |                                  |     |        | SOCIAL HISTORY                                      |                      |
|-------|---------|-------|----------------------------------|-----|--------|-----------------------------------------------------|----------------------|
|       | Center  | Group | Suspected organ manifestation(s) | Age | Gender | Job History                                         | Relevant exposures** |
| IRD01 | Dutch   | IRD   | IAC, LLA                         | 64  | M      | instrument maker/precision engineering              | yes                  |
| IRD02 | Dutch   | IRD   | IAC, AIP                         | 84  | M      | shipping                                            | yes                  |
| IRD03 | Dutch   | IRD   | IAC*, AIP, Pa, GLA               | 70  | F      | hospital cleaner                                    | yes                  |
| IRD04 | Dutch   | IRD   | IAC*, AIP, Pr*                   | 63  | M      | historian, builder                                  | yes                  |
| IRD05 | Dutch   | IRD   | IAC*, AIP, SMG, GLA              | 67  | M      | car industry worker                                 | yes                  |
| IRD06 | Dutch   | IRD   | IAC*, AIP*, RPF, Te*, LLA        | 65  | M      | plasterer                                           | yes                  |
| IRD07 | Dutch   | IRD   | IAC, AIP, GLA                    | 52  | M      | road builder, pigeon holder                         | yes                  |
| IRD08 | Dutch   | IRD   | IAC, AIP, SMG                    | 67  | F      | nurse                                               | no                   |
| IRD09 | Dutch   | IRD   | AIP*, IAC, RPF, Pr, GLA          | 62  | M      | administrative work                                 | no                   |
| IRD10 | Dutch   | IRD   | AIP, IAC, LLA                    | 60  | M      | truck driver                                        | yes                  |
| IRD11 | Dutch   | IRD   | IAC*                             | 63  | F      | teacher                                             | no                   |
| IRD12 | Dutch   | IRD   | IAC*                             | 70  | M      | car mechanic                                        | yes                  |
| IRD13 | Dutch   | IRD   | IAC, LLA                         | 70  | M      | construction green houses                           | yes                  |
| IRD14 | Dutch   | IRD   | IAC*, AIP*, LLA                  | 71  | M      | construction/parks department                       | yes                  |
| IRD15 | Dutch   | IRD   | IAC, AIP*, GLA                   | 58  | M      | truck manufacturing company                         | yes                  |
| IRD16 | Dutch   | IRD   | AIP, LP, GLA                     | 65  | M      | carpenter/taxi driver                               | yes                  |
| IRD17 | Dutch   | IRD   | AIP, IAC, (NP*)                  | 74  | F      | librarian                                           | no                   |
| IRD18 | Dutch   | IRD   | AIP                              | 64  | F      | nurse                                               | no                   |
| IRD19 | Dutch   | IRD   | AIP, IAC                         | 65  | M      | fisherman, diesel motor boat                        | yes                  |
| IRD20 | Dutch   | IRD   | IAC, AIP, Ki                     | 53  | M      | truck driver                                        | yes                  |
| IRD21 | British | IRD   | AIP                              | 68  | F      | finance                                             | yes                  |
| IRD22 | Dutch   | IRD   | IAC, Ki, LLA                     | 69  | M      | iron works                                          | yes                  |
| IRD23 | Dutch   | IRD   | AIP, IAC, Ao                     | 68  | M      | IT                                                  | no                   |
| IRD24 | Dutch   | IRD   | AIP                              | 71  | M      | farmer, petrol station                              | yes                  |
| IRD25 | British | IRD   | AIP, LLA, (UC)                   | 82  | M      | analytic chemist                                    | yes                  |
| IRD26 | British | IRD   | AIP*, IAC*, GLA                  | 70  | M      | electrical industry, lead cables, asbestos exposure | yes                  |
| IRD27 | British | IRD   | IAC*, AIP, SMG                   | 80  | F      | secretarial                                         | no                   |
| IRD28 | British | IRD   | IAC*, LLA, (UC)                  | 62  | M      | electrician                                         | yes                  |
| IRD29 | British | IRD   | AIP, IAC, GLA*, SMG*, Pa         | 79  | M      | blacksmith and small hold farmer                    | yes                  |
| IRD30 | Dutch   | IRD   | IAC*                             | 62  | M      | military                                            | yes                  |
| IRD31 | British | IRD   | IAC*, AIP, LLA                   | 67  | M      | sheet metal worker                                  | yes                  |
| IRD32 | Dutch   | IRD   | AIP, Pr                          | 74  | M      | NA                                                  | NA                   |
| IRD33 | British | IRD   | IAC, MP, GLA, (CD)               | 65  | M      | farmer                                              | yes                  |
| IRD34 | Dutch   | IRD   | IAC, AIP, larynx*                | 80  | M      | NA                                                  | NA                   |
| IRD41 | British | IRD   | AIP*, LLA                        | 52  | M      | Owns a garage                                       | no                   |
| IRD42 | Dutch   | IRD   | IAC, AIP, GLA                    | 70  | M      | painter                                             | yes                  |
| IRD43 | Dutch   | IRD   | IAC, AIP, LLA                    | 82  | M      | oil company                                         | yes                  |
| IRD44 | Dutch   | IRD   | IAC*, AIP                        | 58  | M      | truck driver, road construction                     | yes                  |
| IRD45 | Dutch   | IRD   | IAC, AIP*, LLA                   | 49  | M      | no job                                              | no                   |
| IRD46 | Dutch   | IRD   | IAC, AIP                         | 66  | M      | road construction                                   | yes                  |
| IRD47 | Dutch   | IRD   | IAC, AIP                         | 59  | M      | sunscreen installer                                 | yes                  |
| IRD48 | Dutch   | IRD   | IAC                              | 74  | M      | parks department                                    | yes                  |
| IRD49 | Dutch   | IRD   | IAC, AIP, lungs, LLA             | 42  | M      | plumber                                             | yes                  |
| IRD50 | Dutch   | IRD   | AIP, hypophysitis, SMG           | 64  | M      | car mechanic, sales industrial gases                | yes                  |

IRD=IgG4-related disease  
 IAC=IgG4-associated cholangitis  
 AIP=autoimmune pancreatitis  
 SMG=submandibular gland  
 Pa=parotids  
 SLG=sublingual gland  
 Or=ophthalmic pseudotumour  
 NP=nasal polyps  
 Ao=Aortitis  
 RPF=retroperitoneal fibrosis  
 MP=mesenteric panniculitis  
 LP=liver pseudotumor  
 Ki=kidney  
 Pr=prostate

Te=testis  
 LLA=localized lymphadenopathy  
 GLA=generalized lymphadenopathy  
 CD=Crohn's disease  
 UC=ulcerative colitis  
 \*=histology proven (IRD only)  
 ()= no established IRD manifestation  
 M=male  
 F=female

\*\*relevant exposure= recalled regular occupational (or non-occupational) exposures to solvents, pigments, oil products, industrial and metal dusts (> 1 year)  
 NA=not available/applicable

**Patients IRD35-40 have been described in detail earlier (11)**

| ID    | MEDICAL HISTORY                                                      |                            |                    |           |     |     | MEDICATIONS |     |      |
|-------|----------------------------------------------------------------------|----------------------------|--------------------|-----------|-----|-----|-------------|-----|------|
|       | Presentation                                                         | Allergies                  | Malignancies       | New onset |     | IBD | ERT for EPI | IMT | UDCA |
| IRD01 | abdominal discomfort, fatigue, abnormal serum liver tests            | no                         | no                 | no        | no  | no  | no          | no  | no   |
| IRD02 | obstructive jaundice, itch, weight loss                              | NA                         | Morbus Waldenström | no        | no  | no  | no          | no  | no   |
| IRD03 | itch, weight loss, diarrhea, pale stools, fever                      | NA                         | no                 | no        | no  | no  | no          | no  | no   |
| IRD04 | abdominal pain, weight loss, fever                                   | paroxetine                 | no                 | yes       | no  | no  | no          | no  | yes  |
| IRD05 | obstructive jaundice, itch, weight loss                              | NA                         | no                 | yes       | yes | no  | yes         | no  | yes  |
| IRD06 | abnormal serum liver tests under low dose prednisolone               | no                         | no                 | yes       | yes | no  | yes         | yes | no   |
| IRD07 | obstructive jaundice, weight loss, steatorrhea, fatigue              | no                         | no                 | no        | no  | no  | yes         | no  | no   |
| IRD08 | abdominal discomfort, weight loss, steatorrhea                       | NA                         | no                 | yes       | yes | no  | no          | no  | no   |
| IRD09 | obstructive jaundice, weight loss, urether stenosis                  | no                         | no                 | no        | no  | no  | no          | no  | no   |
| IRD10 | obstructive jaundice, weight loss, steatorrhea, joint pain           | no                         | no                 | no        | no  | no  | yes         | no  | no   |
| IRD11 | weight loss, retrosternal pain, abnormal serum liver tests           | penicillin                 | breast carcinoma   | no        | no  | no  | no          | no  | yes  |
| IRD12 | obstructive jaundice, abdominal pain, weight loss, fever             | no                         | no                 | no        | no  | no  | no          | no  | no   |
| IRD13 | obstructive jaundice, abdominal pain, weight loss                    | azathioprine               | no                 | yes       | no  | no  | no          | no  | no   |
| IRD14 | obstructive jaundice, weight loss                                    | hay fever                  | no                 | yes       | yes | no  | yes         | no  | yes  |
| IRD15 | obstructive jaundice, abdominal pain, weight loss                    | no                         | no                 | yes       | yes | no  | yes         | no  | no   |
| IRD16 | obstructive jaundice, itch, weight loss                              | no                         | no                 | yes       | yes | no  | no          | no  | no   |
| IRD17 | obstructive jaundice, epigastric pain                                | no                         | no                 | yes       | yes | no  | yes         | no  | no   |
| IRD18 | weight loss, steatorrhea                                             | nickel                     | no                 | yes       | yes | no  | yes         | no  | no   |
| IRD19 | abdominal pain, abnormal serum liver tests                           | NA                         | no                 | no        | no  | no  | no          | no  | no   |
| IRD20 | abdominal pain, weight loss, pale stools                             | penicillin                 | no                 | yes       | no  | no  | no          | no  | no   |
| IRD21 | abdominal discomfort, weight loss, steatorrhea                       | eczema                     | no                 | no        | no  | no  | yes         | no  | no   |
| IRD22 | obstructive jaundice, weight loss                                    | no                         | no                 | yes       | no  | no  | no          | no  | no   |
| IRD23 | obstructive jaundice, weight loss                                    | no                         | no                 | no        | no  | no  | no          | no  | no   |
| IRD24 | weight loss                                                          | no                         | no                 | yes       | no  | no  | yes         | no  | no   |
| IRD25 | abdominal discomfort, weight loss, diarrhea                          | eczema/shellfish           | no                 | no        | no  | yes | yes         | no  | no   |
| IRD26 | obstructive jaundice, abdominal pain                                 | no                         | no                 | yes       | yes | no  | yes         | no  | no   |
| IRD27 | weight loss, dry mouth/eyes                                          | asthma                     | no                 | yes       | yes | no  | yes         | no  | no   |
| IRD28 | myalgia, fatigue, known UC, abnormal serum liver tests               | no                         | no                 | no        | no  | yes | no          | no  | yes  |
| IRD29 | weight loss, fatigue, SMG swelling                                   | no                         | no                 | no        | no  | no  | yes         | no  | no   |
| IRD30 | obstructive jaundice, weight loss, fever                             | no                         | caecum carcinoma   | no        | no  | no  | no          | no  | no   |
| IRD31 | obstructive jaundice                                                 | NA                         | no                 | no        | no  | no  | yes         | no  | no   |
| IRD32 | weight loss, steatorrhea                                             | NA                         | no                 | yes       | no  | no  | yes         | no  | no   |
| IRD33 | abdominal discomfort, abnormal serum liver tests                     | hayfever                   | no                 | no        | no  | yes | no          | no  | no   |
| IRD34 | abnormal liver biochemistry, fever                                   | no                         | no                 | no        | no  | no  | no          | no  | no   |
| IRD41 | obstructive symptoms                                                 | NA                         | no                 | yes       | yes | no  | yes         | no  | no   |
| IRD42 | obstructive jaundice, weight loss, abdominal pain                    | NA                         | prostate cancer    | yes       | no  | no  | no          | no  | no   |
| IRD43 | obstructive jaundice, weight loss, itch, abdominal pain              | no                         | no                 | no        | no  | no  | no          | no  | no   |
| IRD44 | obstructive jaundice, weight loss, itch, abdominal pain              | no                         | no                 | no        | no  | no  | no          | no  | no   |
| IRD45 | weight loss, abdominal pain                                          | no                         | Hodgkin lymphoma   | no        | no  | no  | yes         | no  | no   |
| IRD46 | abnormal liver biochemistry (resolved spontaneously), abdominal pain | antibiotics/contrast fluid | no                 | yes       | yes | no  | no          | no  | no   |
| IRD47 | obstructive jaundice, weight loss, abdominal pain                    | no                         | no                 | no        | no  | yes | no          | no  | no   |
| IRD48 | weight loss, itch, fatigue                                           | no                         | no                 | yes       | yes | no  | no          | no  | yes  |
| IRD49 | obstructive jaundice, weight loss                                    | NA                         | no                 | no        | no  | no  | no          | no  | no   |
| IRD50 | hypopituitarism, weight loss                                         | augmentin                  | no                 | yes       | yes | no  | no          | no  | no   |

IRD=IgG4-related disease  
DM=diabetes mellitus  
IBD=inflammatory bowel disease  
ERT= enzyme replacement  
EPI=exocrine pancreatic insufficiency  
IMT=immunomodulatory therapy  
UDCA=ursodeoxycholic acid  
SMG=submandibular gland

| ID    | LABORATORY FINDINGS 1 |     |     |      |      |        |        |       |      |      |      |          |                 |              |       |  |
|-------|-----------------------|-----|-----|------|------|--------|--------|-------|------|------|------|----------|-----------------|--------------|-------|--|
|       | Pre-treatment         |     |     |      |      |        |        |       |      |      |      |          |                 |              |       |  |
|       | Bilirubin             | AST | ALT | ALP  | GGT  | lipase | CA19.9 | IgG1  | IgG2 | IgG3 | IgG4 | IgGtotal | IgG4:IgG1 ratio | IgG4 highest | qPCR  |  |
| IRD01 | 12                    | 102 | 231 | 733  | 1833 | 44     | 112    | 6,8   | 2,12 | 0,39 | 1,74 | 8,8      | 0,256           | 2,1          | 6,89  |  |
| IRD02 | 20                    | 124 | 205 | 329  | 595  | NA     | NA     | 6,81  | 6,92 | 0,39 | 8,13 | 14,2     | 1,194           | 9,8          | 24,53 |  |
| IRD03 | 12                    | 41  | 34  | 360  | 263  | 18     | NA     | 17,3  | 1,37 | 1,9  | 13,5 | 25,3     | 0,78            | 13,5         | 16,91 |  |
| IRD04 | 7                     | 46  | 49  | 1018 | 470  | NA     | 70     | 7,53  | 4,05 | 0,42 | 0,9  | 10,6     | 0,12            | 1,02         | 5,74  |  |
| IRD05 | 26                    | 81  | 96  | 311  | 975  | NA     | 903    | 8,67  | 2,14 | 0,56 | 19   | 20,6     | 2,191           | 19           | 31,02 |  |
| IRD06 | 42                    | 78  | 90  | 476  | 300  | NA     | NA     | NA    | NA   | NA   | NA   | NA       | NA              | 1,94         | 5,73  |  |
| IRD07 | 11                    | 21  | 25  | 140  | 61   | NA     | 212    | 7,52  | 8,8  | 0,55 | 6,17 | 17,6     | 0,82            | 6,17         | 24,92 |  |
| IRD08 | 201                   | 123 | 198 | 405  | 562  | NA     | NA     | 11,69 | 3,16 | 2,16 | 15   | 23,3     | 1,283           | 15           | 21,28 |  |
| IRD09 | 43                    | 110 | 199 | 341  | 657  | 426    | 928    | 13,2  | 5,91 | 1,3  | 12,4 | 21,7     | 0,939           | 12,4         | 20,39 |  |
| IRD10 | 8                     | 18  | 22  | 68   | 34   | 37     | 10     | 10,7  | 3,96 | 0,77 | 1,47 | 15       | 0,137           | 1,63         | 8,98  |  |
| IRD11 | 8                     | 48  | 48  | 259  | 256  | NA     | NA     | 8,49  | 4,38 | 0,3  | 2,42 | NA       | 0,285           | 3,19         | 9,29  |  |
| IRD12 | 4,3                   | 47  | 40  | 329  | 392  | NA     | 32     | 12,1  | 5,92 | 0,46 | 1,4  | 18,4     | 0,116           | 1,4          | 61,46 |  |
| IRD13 | 9                     | 37  | 28  | 206  | 233  | 30     | 10     | 7,95  | 6,85 | 0,29 | 2,22 | 13,8     | 0,279           | 2,22         | 3,13  |  |
| IRD14 | 7                     | 49  | 50  | 508  | 386  | 6      | 39     | 9,17  | 3,54 | 0,17 | 19,3 | 22,7     | 2,105           | 19,4         | 47,00 |  |
| IRD15 | 6                     | 25  | 33  | 263  | 288  | 146    | 125    | 6,73  | 4,86 | 0,83 | 2,04 | 11       | 0,303           | 2,04         | 3,54  |  |
| IRD16 | 315                   | 67  | 34  | 228  | 300  | 25     | 4785   | 11,3  | 2,15 | 0,19 | 45,2 | 37,9     | 4               | 56,6         | 33,16 |  |
| IRD17 | 6                     | 27  | 21  | 71   | 9    | 11     | 19     | 7,2   | 3,37 | 0,4  | 8,82 | 14       | 1,225           | 10,8         | 51,51 |  |
| IRD18 | 4                     | 22  | 38  | 127  | 17   | 12     | 10     | 7,44  | 4,03 | 0,21 | 7,75 | 13       | 1,042           | 8,3          | 36,24 |  |
| IRD19 | 15                    | 39  | 69  | 709  | 747  | NA     | NA     | NA    | NA   | NA   | 6,98 | NA       | NA              | 6,98         | 5,84  |  |
| IRD20 | 107                   | 162 | 230 | 791  | 1657 | NA     | NA     | 13,1  | 6,22 | 2,05 | 4,89 | 20,3     | 0,373           | 4,89         | 15,89 |  |
| IRD21 | 8                     | NA  | 18  | 189  | 24   | NA     | 23     | 7,86  | 5,4  | 0,29 | 2,41 | 13,6     | 0,307           | 2,41         | 8,78  |  |
| IRD22 | 14                    | 37  | 36  | 291  | 355  | 39     | 13     | 10,7  | 3,27 | 0,32 | 8,1  | 18,9     | 0,757           | 8,1          | 24,63 |  |
| IRD23 | 31                    | 54  | 115 | 225  | 212  | 145    | 63     | 6,39  | 2,07 | 0,21 | 1,4  | 9        | 0,219           | 1,47         | 11,93 |  |
| IRD24 | 5                     | 22  | 18  | 97   | 49   | 9      | 24     | 9,17  | 2,82 | 0,42 | 2,51 | 12       | 0,274           | 2,51         | 15,03 |  |
| IRD25 | 7                     | 34  | 16  | 152  | 25   | NA     | 23     | 5,33  | 11,1 | 0,71 | 6,67 | 18,5     | 1,251           | 6,67         | 31,24 |  |
| IRD26 | 82                    | NA  | 100 | 649  | 189  | NA     | 16     | 6,39  | NA   | NA   | 2,77 | 9,59     | 0,433           | 2,21         | 10,14 |  |
| IRD27 | 7                     | 42  | 54  | 457  | 54   | NA     | NA     | 7,47  | NA   | NA   | 7,15 | 15,2     | 0,957           | 7,15         | 33,28 |  |
| IRD28 | 38                    | 47  | 114 | 1336 | 1127 | NA     | 9      | 10,3  | NA   | NA   | 67,4 | 70,4     | 6,544           | 67,4         | 42,30 |  |
| IRD29 | 9                     | NA  | 16  | 209  | 25   | NA     | 26     | 13,4  | NA   | NA   | 9    | 20,1     | 0,672           | 9            | 10,13 |  |
| IRD30 | 10                    | 31  | 60  | 209  | 372  | 35     | 37     | 6,51  | 4,13 | 0,16 | 0,39 | 10,1     | 0,06            | 0,39         | 5,53  |  |
| IRD31 | NA                    | NA  | NA  | NA   | NA   | NA     | NA     | NA    | NA   | NA   | NA   | NA       | NA              | 1,26         | 22,03 |  |
| IRD32 | NA                    | NA  | NA  | NA   | NA   | NA     | NA     | NA    | NA   | NA   | 8,3  | NA       | NA              | 8,3          | 22,40 |  |
| IRD33 | 5                     | 48  | 23  | 200  | 165  | NA     | 18     | NA    | NA   | NA   | 5,81 | 21,7     | NA              | 5,81         | 10,27 |  |
| IRD34 | 8                     | 38  | 38  | 162  | 240  | NA     | NA     | 5,19  | 3,79 | 0,24 | 1,4  | 8,6      | 0,269           | 1,4          | 26,04 |  |
| IRD41 | 2                     | NA  | 16  | 168  | 34   | NA     | 9      | 8,06  | 2,72 | 0,35 | 2,56 | 11,5     | 0,318           | 1,89         | 4,92  |  |
| IRD42 | NA                    | NA  | NA  | NA   | NA   | NA     | NA     | NA    | NA   | NA   | 3,4  | NA       | NA              | 3,4          | 24,70 |  |
| IRD43 | 6                     | 74  | 127 | 497  | 733  | 24     | 40     | 8,56  | 4,92 | 0,18 | 12,7 | 18,4     | 1,484           | 12,7         | 37,50 |  |
| IRD44 | 121                   | 76  | 93  | 321  | 1352 | 10     | 43     | 6,64  | 2,45 | 0,42 | 0,52 | 9,2      | 0,078           | 2,38         | 6,31  |  |
| IRD45 | 20                    | 29  | 20  | 174  | 293  | 10     | 17     | 11,9  | 5,64 | 0,69 | 3,75 | 17,9     | 0,315           | 4,12         | 9,63  |  |
| IRD46 | 6                     | 24  | 19  | 86   | 15   | NA     | NA     | 8,24  | 3,9  | 0,71 | 2,98 | NA       | 0,362           | 2,98         | 9,36  |  |
| IRD47 | 68                    | 347 | 406 | 1185 | 713  | 110    | 24     | 4,82  | 3,14 | 0,42 | 4,28 | 8        | 0,888           | 4,28         | 40,80 |  |
| IRD48 | 6                     | 32  | 31  | 307  | 107  | 8      | 45     | 6,34  | 4,49 | 1,05 | 24,8 | 26       | 3,912           | 31,6         | 54,70 |  |
| IRD49 | 53                    | 91  | 74  | 964  | 349  | NA     | 221    | 16,6  | 4,3  | 1,9  | 1,1  | 24,4     | 0,066           | 1,3          | 7,92  |  |
| IRD50 | 7                     | 25  | 25  | 69   | 22   | 6      | 16     | 7,59  | 8,71 | 0,55 | 13,6 | 14,9     | 1,792           | 13,6         | 27,20 |  |

IRD=IgG4-related disease  
AST=aspartate aminotransferase  
ALT=alanine aminotransferase  
ALP=alkaline phosphatase  
GGT=gamma-glutamyl transferase  
CA19.9=carboxylic anhydrase 19.9  
IgG=Immunoglobulin G  
qPCR=quantitative PCR  
NA=not available/applicable

| ID    | LABORATORY FINDINGS 2  |     |     |     |      |        |        |      |      |      |      |          |      |
|-------|------------------------|-----|-----|-----|------|--------|--------|------|------|------|------|----------|------|
|       | 4-6 weeks of treatment |     |     |     |      |        |        |      |      |      |      |          |      |
|       | Bilirubin              | AST | ALT | ALP | GGT  | lipase | CA19.9 | IgG1 | IgG2 | IgG3 | IgG4 | IgGtotal | qPCR |
| IRD01 | 12                     | 102 | 280 | 411 | 2276 | 45     | 147    | 4,87 | 1,64 | 0,24 | 1,11 | 6,8      | 4,92 |
| IRD02 | 6                      | 21  | 35  | 88  | 184  | NA     | NA     | 4,44 | 5,76 | 0,24 | 5,47 | 9,2      | 5,94 |
| IRD03 | 16                     | 62  | 47  | 339 | 314  | 44     | NA     | 14,9 | 1,64 | 1,64 | 12,7 | 23,6     | 7,03 |
| IRD04 | NA                     | NA  | NA  | NA  | NA   | NA     | NA     | NA   | NA   | NA   | NA   | NA       | NA   |
| IRD05 | 7                      | 35  | 51  | 184 | 595  | NA     | 128    | 5,97 | 3,16 | 0,38 | 11,3 | 12,7     | NA   |
| IRD06 | NA                     | NA  | NA  | NA  | NA   | NA     | NA     | NA   | NA   | NA   | NA   | NA       | NA   |
| IRD07 | NA                     | NA  | NA  | NA  | NA   | NA     | NA     | NA   | NA   | NA   | NA   | NA       | NA   |
| IRD08 | 92                     | 76  | 163 | 243 | 126  | NA     | NA     | NA   | NA   | NA   | NA   | NA       | NA   |
| IRD09 | 11                     | 35  | 59  | 130 | 526  | 282    | 253    | 8,43 | 4,22 | 0,71 | 10,4 | 14,9     | NA   |
| IRD10 | 6                      | 16  | 21  | 63  | 31   | 35     | 12     | 7,84 | 2,94 | 0,48 | 0,72 | 10,9     | 6,09 |
| IRD11 | NA                     | NA  | NA  | NA  | NA   | NA     | NA     | NA   | NA   | NA   | NA   | NA       | NA   |
| IRD12 | 9                      | 29  | 45  | 238 | 319  | NA     | NA     | 10,1 | 4,12 | 0,3  | 0,97 | NA       | 3,17 |
| IRD13 | NA                     | NA  | NA  | NA  | NA   | NA     | NA     | NA   | NA   | NA   | NA   | NA       | NA   |
| IRD14 | 8                      | 47  | 77  | 416 | 544  | 6      | 76     | 7,16 | 4,89 | 0,39 | 9,82 | 17       | 8,11 |
| IRD15 | 8                      | 15  | 22  | 135 | 126  | 38     | 39     | 3,69 | 3,45 | 0,5  | 1,1  | 8,4      | 1,87 |
| IRD16 | 40                     | 47  | 50  | 145 | 556  | 23     | 242    | 6,05 | 2,67 | 0,67 | 16,2 | 16,8     | 9,64 |
| IRD17 | NA                     | NA  | NA  | NA  | NA   | NA     | NA     | NA   | NA   | NA   | NA   | NA       | NA   |
| IRD18 | 5                      | 26  | 35  | 102 | 17   | 13     | 9      | 6,65 | 3,54 | 0,14 | 5,36 | 11       | 7,95 |
| IRD19 | 6                      | 27  | 20  | 143 | 218  | NA     | NA     | 7,09 | 3,65 | 0,65 | 3,58 | 11,9     | 3,36 |
| IRD20 | NA                     | NA  | NA  | NA  | NA   | NA     | NA     | NA   | NA   | NA   | NA   | NA       | NA   |
| IRD21 | 7                      | NA  | 25  | 178 | 23   | NA     | NA     | 6,67 | 4,32 | 0,23 | 2,19 | 14,3     | NA   |
| IRD22 | 7                      | 36  | 42  | 176 | 286  | 36     | 12     | 9,34 | 3,88 | 0,26 | 6,14 | 14,7     | 6,49 |
| IRD23 | 10                     | 20  | 56  | 95  | 251  | 61     | 23     | 6,65 | 1,83 | 0,16 | 0,98 | 8,2      | NA   |
| IRD24 | NA                     | NA  | NA  | NA  | NA   | NA     | NA     | NA   | NA   | NA   | NA   | NA       | NA   |
| IRD25 | 11                     | NA  | 17  | 134 | 30   | NA     | NA     | 5,04 | NA   | NA   | 4,58 | 15,1     | NA   |
| IRD26 | 11                     | NA  | 22  | 300 | 19   | NA     | NA     | 3,65 | NA   | NA   | 1,63 | 6,62     | NA   |
| IRD27 | 6                      | NA  | 28  | 247 | 24   | NA     | NA     | NA   | NA   | NA   | 3,73 | 10       | NA   |
| IRD28 | 33                     | NA  | 85  | 674 | 1025 | NA     | 6      | 8,84 | NA   | NA   | 42   | 45,1     | NA   |
| IRD29 | 13                     | NA  | 21  | 130 | 17   | NA     | NA     | 12,2 | NA   | NA   | 3,67 | 16,8     | NA   |
| IRD30 | NA                     | NA  | NA  | NA  | NA   | NA     | NA     | NA   | NA   | NA   | NA   | NA       | NA   |
| IRD31 | 10                     | NA  | 15  | 208 | NA   | NA     | NA     | 6,06 | 2,02 | 0,22 | 1,26 | 12,2     | NA   |
| IRD32 | 10                     | 19  | 22  | 72  | 19   | 9      | NA     | NA   | NA   | NA   | NA   | NA       | NA   |
| IRD33 | 7                      | NA  | 22  | 209 | 67   | NA     | NA     | NA   | NA   | NA   | 3,87 | 15,6     | NA   |
| IRD34 | 15                     | 36  | 33  | 98  | 209  | 18     | NA     | NA   | NA   | NA   | NA   | NA       | NA   |
| IRD41 | 14                     | NA  | 21  | 114 | 34   | NA     | NA     | 8,9  | 2    | 0,38 | 1,46 | 11,7     | NA   |
| IRD42 | NA                     | NA  | NA  | NA  | NA   | NA     | NA     | NA   | NA   | NA   | NA   | NA       | NA   |
| IRD43 | NA                     | NA  | NA  | NA  | NA   | NA     | NA     | NA   | NA   | NA   | NA   | NA       | NA   |
| IRD44 | NA                     | NA  | NA  | NA  | NA   | NA     | NA     | NA   | NA   | NA   | NA   | NA       | NA   |
| IRD45 | NA                     | NA  | NA  | NA  | NA   | NA     | NA     | NA   | NA   | NA   | NA   | NA       | NA   |
| IRD46 | NA                     | NA  | NA  | NA  | NA   | NA     | NA     | NA   | NA   | NA   | NA   | NA       | NA   |
| IRD47 | NA                     | NA  | NA  | NA  | NA   | NA     | NA     | NA   | NA   | NA   | NA   | NA       | NA   |
| IRD48 | 6                      | 31  | 48  | 252 | 137  | NA     | NA     | NA   | NA   | NA   | 16,9 | NA       | NA   |
| IRD49 | 24                     | 47  | 75  | 226 | 712  | NA     | NA     | 6,3  | 2,6  | 0,5  | 0,7  | NA       | NA   |
| IRD50 | NA                     | NA  | NA  | NA  | NA   | NA     | NA     | NA   | NA   | NA   | NA   | NA       | NA   |

IRD=IgG4-related disease  
AST=aspartate aminotransferase  
ALT=alanine aminotransferase  
ALP=alkaline phosphatase  
GGT=gamma-glutamyl transferase  
CA19.9=carbonic anhydrase 19.9  
IgG=Immunoglobulin G  
qPCR=quantitative PCR  
NA=not available/applicable

| ID    | LABORATORY FINDINGS 3 |     |     |     |      |        |      |      | Auto-antibodies |        |
|-------|-----------------------|-----|-----|-----|------|--------|------|------|-----------------|--------|
|       | 8 weeks of treatment  |     |     |     |      |        |      |      | ANA             | ANCA   |
|       | Bilirubin             | AST | ALT | ALP | GGT  | CA19.9 | IgG4 | qPCR |                 |        |
| IRD01 | 10                    | 57  | 167 | 353 | 1789 | 187    | 0,93 | 3,29 | 0               | ANCA   |
| IRD02 | 5                     | 19  | 27  | 44  | 53   | NA     | 3,39 | NA   | NA              | NA     |
| IRD03 | 10                    | 39  | 53  | 117 | 153  | 93     | 3,99 | 2,69 | 0               | 0      |
| IRD04 | NA                    | NA  | NA  | NA  | NA   | NA     | NA   | NA   | 0               | 0      |
| IRD05 | NA                    | NA  | NA  | NA  | NA   | NA     | NA   | NA   | NA              | NA     |
| IRD06 | NA                    | NA  | NA  | NA  | NA   | NA     | NA   | NA   | 0               | atypic |
| IRD07 | NA                    | NA  | NA  | NA  | NA   | NA     | NA   | NA   | NA              | NA     |
| IRD08 | NA                    | NA  | NA  | NA  | NA   | NA     | NA   | NA   | 0               | 0      |
| IRD09 | 8                     | 39  | 76  | 147 | 576  | 193    | 8,3  | 1,81 | NA              | NA     |
| IRD10 | NA                    | NA  | NA  | NA  | NA   | NA     | NA   | NA   | NA              | NA     |
| IRD11 | NA                    | NA  | NA  | NA  | NA   | NA     | NA   | NA   | NA              | NA     |
| IRD12 | NA                    | NA  | NA  | NA  | NA   | NA     | NA   | NA   | NA              | NA     |
| IRD13 | 17                    | 22  | 33  | 143 | 193  | 17     | 1,16 | 1,85 | NA              | NA     |
| IRD14 | 7                     | 62  | 118 | 336 | 673  | 67     | 5,09 | 1,35 | NA              | NA     |
| IRD15 | 12                    | 17  | 20  | 111 | 73   | 28     | 4,55 | 0,85 | NA              | NA     |
| IRD16 | 14                    | 39  | 58  | 120 | 762  | 453    | 11,5 | 1,65 | NA              | NA     |
| IRD17 | NA                    | NA  | NA  | NA  | NA   | NA     | NA   | NA   | NA              | NA     |
| IRD18 | 7                     | 24  | 31  | 87  | 18   | 14     | 4,03 | 3,09 | NA              | NA     |
| IRD19 | 4                     | 16  | 17  | 86  | 104  | 24     | 3,59 | 1,35 | NA              | NA     |
| IRD20 | NA                    | NA  | NA  | NA  | NA   | NA     | NA   | NA   | 0               | NA     |
| IRD21 | NA                    | NA  | NA  | NA  | NA   | NA     | NA   | NA   | 0               | 0      |
| IRD22 | 7                     | 34  | 37  | 120 | 209  | 10     | 4,25 | 1,47 | NA              | NA     |
| IRD23 | 6                     | 25  | 55  | 82  | 200  | 21     | 0,83 | 2,99 | NA              | NA     |
| IRD24 | NA                    | NA  | NA  | NA  | NA   | NA     | NA   | NA   | NA              | NA     |
| IRD25 | NA                    | NA  | NA  | NA  | NA   | NA     | NA   | NA   | 0               | 0      |
| IRD26 | NA                    | NA  | NA  | NA  | NA   | NA     | NA   | NA   | 0               | 0      |
| IRD27 | NA                    | NA  | NA  | NA  | NA   | NA     | NA   | NA   | 0               | 0      |
| IRD28 | NA                    | NA  | NA  | NA  | NA   | NA     | NA   | NA   | 0               | C-ANCA |
| IRD29 | NA                    | NA  | NA  | NA  | NA   | NA     | NA   | NA   | 0               | C-ANCA |
| IRD30 | NA                    | NA  | NA  | NA  | NA   | NA     | NA   | NA   | NA              | NA     |
| IRD31 | NA                    | NA  | NA  | NA  | NA   | NA     | NA   | NA   | 0               | 0      |
| IRD32 | NA                    | NA  | NA  | NA  | NA   | NA     | NA   | NA   | NA              | NA     |
| IRD33 | NA                    | NA  | NA  | NA  | NA   | NA     | NA   | NA   | 0               | C-ANCA |
| IRD34 | NA                    | NA  | NA  | NA  | NA   | NA     | NA   | NA   | NA              | NA     |
| IRD41 | NA                    | NA  | NA  | NA  | NA   | NA     | NA   | NA   | NA              | NA     |
| IRD42 | NA                    | NA  | NA  | NA  | NA   | NA     | NA   | NA   | NA              | NA     |
| IRD43 | 5                     | 32  | 59  | 119 | 307  | NA     | 8,2  | NA   | NA              | NA     |
| IRD44 | NA                    | NA  | NA  | NA  | NA   | NA     | NA   | NA   | NA              | NA     |
| IRD45 | NA                    | NA  | NA  | NA  | NA   | NA     | NA   | NA   | NA              | NA     |
| IRD46 | NA                    | NA  | NA  | NA  | NA   | NA     | NA   | NA   | NA              | NA     |
| IRD47 | NA                    | NA  | NA  | NA  | NA   | NA     | NA   | NA   | NA              | NA     |
| IRD48 | NA                    | NA  | NA  | NA  | NA   | NA     | NA   | NA   | NA              | NA     |
| IRD49 | 13                    | 33  | 58  | 315 | 585  | NA     | NA   | NA   | NA              | NA     |
| IRD50 | NA                    | NA  | NA  | NA  | NA   | NA     | NA   | NA   | NA              | NA     |

IRD=IgG4-related disease

AST=aspartate aminotransferase

ALT=alanine aminotransferase

ALP=alkaline phosphatase

GGT=gamma-glutamyl transferase

CA19.9=carbonic anhydrase 19.9

IgG=Immunoglobulin G

qPCR=quantitative PCR

ANA=anti-nuclear antibody

ANCA=antineutrophil cytoplasmic antibody

C-=cytoplasmic

P-=perinuclear

NA=not available/applicable

| IMAGING 1 |                          |                                   |                   |                           |
|-----------|--------------------------|-----------------------------------|-------------------|---------------------------|
| ID        | Type                     | Localization stenosis/obstruction | Typical for AIP?* | Suggestive findings AIP?* |
| IRD01     | CT, MRCP                 | hilar                             | no                | no                        |
| IRD02     | CT, ERCP, EUS            | DCBD, IHBD                        | yes               | no                        |
| IRD03     | MRI, ERCP, EUS, PET      | DCBD                              | no                | yes                       |
| IRD04     | CT, MRI, ERCP            | IHBD                              | no                | yes                       |
| IRD05     | CT, PET, US              | PCBD                              | yes               | no                        |
| IRD06     | CT, MRCP, ERCP           | multifocal, DCBD                  | no                | no                        |
| IRD07     | CT, MRCP, ERCP, AUS      | Hilar                             | no                | yes                       |
| IRD08     | CT, ERCP, EUS, AUS       | DCBD, PD                          | yes               | no                        |
| IRD09     | CT, MRI, ERCP, PET, EUS  | DCBD                              | yes               | no                        |
| IRD10     | CT, ERCP, EUS            | CBD, IP                           | yes               | no                        |
| IRD11     | CT, MRI, AUS             | hilar                             | no                | no                        |
| IRD12     | CT, MRI, PET, AUS        | hilar                             | no                | no                        |
| IRD13     | CT, ERCP, AUS            | hilar                             | no                | no                        |
| IRD14     | ERCP                     | DCBD                              | yes               | no                        |
| IRD15     | CT, ERCP, MRCP           | CBD, IP                           | yes               | no                        |
| IRD16     | CT, MRI, ERCP, EUS, AUS  | DCBD                              | yes               | no                        |
| IRD17     | CT, EUS, AUS             | IP                                | yes               | no                        |
| IRD18     | CT, AUS                  | none                              | yes               | no                        |
| IRD19     | CT, ERCP, AUS, EUS       | DCBD                              | no                | yes                       |
| IRD20     | CT, EUS                  | distal CBD                        | yes               | no                        |
| IRD21     | MRCP, CT                 | none                              | yes               | no                        |
| IRD22     | CT, ERCP, AUS            | hilar                             | no                | no                        |
| IRD23     | CT, ERCP                 | DCBD                              | yes               | no                        |
| IRD24     | CT, AUS                  | DCBD                              | no                | no                        |
| IRD25     | MRCP, CT                 | none                              | no                | yes                       |
| IRD26     | CT, MRCP, ERCP           | CBD                               | no                | yes                       |
| IRD27     | MRCP, CT, AUS, MRI neck  | CBD                               | no                | yes                       |
| IRD28     | CT, MRCP, ERCP           | multifocal (IHBD)                 | no                | no                        |
| IRD29     | MRI neck, CT             | none                              | no                | yes                       |
| IRD30     | CT, ERCP                 | hilar                             | no                | no                        |
| IRD31     | MRCP, EUS, ERCP, CT      | CBD                               | no                | yes                       |
| IRD32     | CT, EUS                  | none                              | yes               | no                        |
| IRD33     | MRCP, MRI, CT            | CBD/IHBD                          | no                | no                        |
| IRD34     | CT, ERCP, AUS            | hilar                             | no                | yes                       |
| IRD41     | CT, MRCP                 | DCBD                              | no                | yes                       |
| IRD42     | CT, PET, EUS             | DCBD                              | no                | yes                       |
| IRD43     | CT, ERCP                 | Hilar                             | no                | yes                       |
| IRD44     | CT, MRI                  | Hilar                             | no                | yes                       |
| IRD45     | CT, MRI, ERCP            | enhancement CBD                   | no                | yes                       |
| IRD46     | CT, MRI, EUS             | enhancement CBD                   | yes               | no                        |
| IRD47     | CT, MRCP, ERCP, EUS, AUS | DCBD                              | yes               | no                        |
| IRD48     | MRCP, AUS                | multifocal                        | no                | no                        |
| IRD49     | CT, MRCP, ERCP, PET      | hilar                             | yes               | no                        |
| IRD50     | CT, AUS                  | none                              | no                | yes                       |

IRD=IgG4-related disease

AIP=autoimmune pancreatitis

\*diffusely enlarged pancreas, irregular pancreatic duct

\*\* (multi)focal pancreatic mass, focal pancreatic duct stricture, pancreatic atrophy

CT=computed tomography

MRI=magnetic resonance imaging

MRCP=magnetic resonance cholangiopancreatography

ERCP=endoscopic retrograde cholangiopancreatography

PET=positron emission tomography

AUS=abdominal ultrasound

EUS=endoscopic ultrasound

IHBD=intra hepatic bile ducts

CBD=common bile duct

DCBD= distal CBD

PD = pancreatic duct

NA=not available/applicable



| IMAGING 2 |                         |                                   |                                      |                                                                  |
|-----------|-------------------------|-----------------------------------|--------------------------------------|------------------------------------------------------------------|
| ID        | Suspect for malignancy? | Malignancy type                   | Suspect for sclerosing cholangitis?* | Lymphadenopathy                                                  |
| IRD01     | yes                     | Klatskin tumour Bismuth type IV   | no                                   | locoregional                                                     |
| IRD02     | yes                     | NA                                | no                                   | no                                                               |
| IRD03     | no                      | NA                                | yes                                  | para-aortal/lungs                                                |
| IRD04     | yes                     | CCA non-specified                 | no                                   | no                                                               |
| IRD05     | yes                     | Klatskin tumour Bismuth type IIIb | yes                                  | hepatopancreatobiliary, mediastinal, lung hilum, lungs, inguinal |
| IRD06     | yes                     | PCA                               | yes                                  | locoregional                                                     |
| IRD07     | yes                     | PCA                               | yes                                  | lung hilum, mediastinal, paratracheal                            |
| IRD08     | no                      | NA                                | no                                   | no                                                               |
| IRD09     | no                      | NA                                | no                                   | mediastinal, inguinal                                            |
| IRD10     | yes                     | PCA                               | no                                   | locoregional                                                     |
| IRD11     | yes                     | CCA non-specified                 | no                                   | no                                                               |
| IRD12     | yes                     | Klatskin tumour Bismuth type IIIa | no                                   | no                                                               |
| IRD13     | yes                     | Klatskin tumour Bismuth type IIIb | no                                   | locoregional                                                     |
| IRD14     | yes                     | distal CCA/PCA                    | no                                   | locoregional                                                     |
| IRD15     | yes                     | PCA                               | no                                   | locoregional, abdominal                                          |
| IRD16     | yes                     | distal CCA/PCA/liver metastasis   | no                                   | locoregional, abdominal, axial                                   |
| IRD17     | yes                     | PCA                               | no                                   | no                                                               |
| IRD18     | no                      | NA                                | no                                   | no                                                               |
| IRD19     | yes                     | PCA                               | no                                   | no                                                               |
| IRD20     | yes                     | distal CCA                        | no                                   | no                                                               |
| IRD21     | no                      | NA                                | no                                   | no                                                               |
| IRD22     | yes                     | Klatskin tumour Bismuth type IIIb | no                                   | locoregional                                                     |
| IRD23     | yes                     | distal CCA/PCA                    | no                                   | no                                                               |
| IRD24     | yes                     | PCA                               | no                                   | no                                                               |
| IRD25     | yes                     | IPMN                              | no                                   | locoregional                                                     |
| IRD26     | yes                     | PCA                               | no                                   | locoregional, lung hilum, mesenteric                             |
| IRD27     | yes                     | CCA                               | no                                   | none                                                             |
| IRD28     | no                      | NA                                | yes                                  | locoregional                                                     |
| IRD29     | yes                     | lymphoma                          | no                                   | inguinal/mediastinal/paraortic                                   |
| IRD30     | yes                     | CCA non-specified                 | yes                                  | no                                                               |
| IRD31     | yes                     | PCA                               | no                                   | locoregional                                                     |
| IRD32     | no                      | NA                                | no                                   | no                                                               |
| IRD33     | no                      | NA                                | yes                                  | mesenteric, locoregional                                         |
| IRD34     | yes                     | Klatskin type IIIa                | yes                                  | no                                                               |
| IRD41     | yes                     | ampullary/duodenal neoplasm       | no                                   | locoregional                                                     |
| IRD42     | yes                     | PCA                               | no                                   | no                                                               |
| IRD43     | yes                     | Klatskin type IIIb                | no                                   | no                                                               |
| IRD44     | yes                     | Klatskin type IIIa                | no                                   | locoregional                                                     |
| IRD45     | no                      | NA                                | no                                   | locoregional                                                     |
| IRD46     | yes                     | PCA                               | no                                   | no                                                               |
| IRD47     | yes                     | PCA                               | no                                   | no                                                               |
| IRD48     | no                      | NA                                | yes                                  | no                                                               |
| IRD49     | yes                     | Klatskin type IIIa                | no                                   | locoregional                                                     |
| IRD50     | no                      | NA                                | no                                   | no                                                               |

IRD=IgG4-related disease

CCA=cholangiocarcinoma

PCA=pancreatic carcinoma

IPMN=intraductal papillary mucinous neoplasm

NA=not available/applicable

| ID    | HISTOPATHOLOGY 1 |               |                |                  |
|-------|------------------|---------------|----------------|------------------|
|       | Cytology 1       |               | Cytology 2     |                  |
|       | Biliary brushing | Punction type | Punction organ | Punction outcome |
| IRD01 | NA               | NA            | NA             | NA               |
| IRD02 | benign           | NA            | NA             | NA               |
| IRD03 | NA               | NA            | NA             | NA               |
| IRD04 | NA               | NA            | NA             | NA               |
| IRD05 | atypic cells     | NA            | NA             | NA               |
| IRD06 | NA               | NA            | NA             | NA               |
| IRD07 | benign           | NA            | NA             | NA               |
| IRD08 | NA               | NA            | NA             | NA               |
| IRD09 | NA               | NA            | NA             | NA               |
| IRD10 | benign           | EUS           | pancreas       | benign           |
| IRD11 | NA               | NA            | NA             | NA               |
| IRD12 | atypic cells     | NA            | NA             | NA               |
| IRD13 | adenocarcinoma*  | NA            | NA             | NA               |
| IRD14 | suspect          | NA            | NA             | NA               |
| IRD15 | inflammation     | NA            | pancreas       | benign           |
| IRD16 | NA               | NA            | NA             | NA               |
| IRD17 | NA               | EUS           | pancreas       | inflammation     |
| IRD18 | NA               | NA            | NA             | NA               |
| IRD19 | benign           | yes           | pancreas       | inflammation     |
| IRD20 | NA               | NA            | NA             | NA               |
| IRD21 | NA               | NA            | NA             | NA               |
| IRD22 | atypic cells     | NA            | NA             | NA               |
| IRD23 | atypic cells     | EUS           | pancreas       | benign           |
| IRD24 | NA               | NA            | NA             | NA               |
| IRD25 | NA               | NA            | NA             | NA               |
| IRD26 | benign           | NA            | NA             | NA               |
| IRD27 | NA               | FNA           | SMG            | benign           |
| IRD28 | NA               | NA            | NA             | NA               |
| IRD29 | NA               | NA            | NA             | NA               |
| IRD30 | NA               | NA            | NA             | NA               |
| IRD31 | benign           | FNA           | pancreas/LN    | benign           |
| IRD32 | NA               | NA            | NA             | NA               |
| IRD33 | NA               | NA            | NA             | NA               |
| IRD34 | benign           | NA            | NA             | NA               |
| IRD41 | NA               | NA            | NA             | NA               |
| IRD42 | NA               | NA            | NA             | NA               |
| IRD43 | NA               | US            | pancreas       | inflammation     |
| IRD44 | NA               | EUS           | pancreas       | benign           |
| IRD45 | NA               | EUS           | pancreas       | benign           |
| IRD46 | NA               | EUS           | pancreas       | benign           |
| IRD47 | NA               | EUS           | pancreas       | benign           |
| IRD48 | NA               | NA            | NA             | NA               |
| IRD49 | atypic cells     | EUS           | pancreas       | atypic cells     |
| IRD50 | NA               | NA            | NA             | NA               |

IRD=IgG4-related disease

EUS=endoscopic ultrasound guided

US=ultrasound guided

NA=not available/applicable

\*IRD13 was diagnosed with cholangiocarcinoma 2 years after inclusion

| ID    | HISTOPATHOLOGY 1 |               |                | Histology 1      |           |                 |     |     |     |     |
|-------|------------------|---------------|----------------|------------------|-----------|-----------------|-----|-----|-----|-----|
|       | Cytology 1       | Cytology 2    |                | Type             | Organ     | IgG4+ cells/hpf | SF  | OP  | E   |     |
|       | Biliary brushing | Punction type | Punction organ | Punction outcome |           |                 |     |     |     |     |
| IRD01 | NA               | NA            | NA             | NA               | biopsy    | liver           | no  | NA  | NA  | NA  |
| IRD02 | benign           | NA            | NA             | NA               | NA        | NA              | NA  | NA  | NA  | NA  |
| IRD03 | NA               | NA            | NA             | NA               | biopsy    | liver           | 10  | NA  | NA  | NA  |
| IRD04 | NA               | NA            | NA             | NA               | resection | tumor           | >10 | no  | yes | NA  |
| IRD05 | atypic cells     | NA            | NA             | NA               | biopsy    | SMG             | <10 | NA  | NA  | NA  |
| IRD06 | NA               | NA            | NA             | NA               | resection | pancreas        | 20  | NA  | NA  | NA  |
| IRD07 | benign           | NA            | NA             | NA               | NA        | NA              | NA  | NA  | NA  | NA  |
| IRD08 | NA               | NA            | NA             | NA               | NA        | NA              | NA  | NA  | NA  | NA  |
| IRD09 | NA               | NA            | NA             | NA               | biopsy    | duodenum        | 30  | no  | NA  | yes |
| IRD10 | benign           | EUS           | pancreas       | benign           | biopsy    | duodenum        | <10 | no  | NA  | NA  |
| IRD11 | NA               | NA            | NA             | NA               | resection | tumor           | 75  | NA  | NA  | NA  |
| IRD12 | atypic cells     | NA            | NA             | NA               | resection | tumor           | 52  | yes | NA  | NA  |
| IRD13 | adenocarcinoma*  | NA            | NA             | NA               | biopsy    | gall bladder    | >50 | NA  | NA  | yes |
| IRD14 | suspect          | NA            | NA             | NA               | resection | tumor           | >50 | NA  | NA  | yes |
| IRD15 | inflammation     | NA            | pancreas       | benign           | biopsy    | pancreas        | >25 | no  | no  | no  |
| IRD16 | NA               | NA            | NA             | NA               | biopsy    | liver           | <10 | NA  | NA  | yes |
| IRD17 | NA               | EUS           | pancreas       | inflammation     | biopsy    | nasal polyps    | >50 | no  | no  | no  |
| IRD18 | NA               | NA            | NA             | NA               | NA        | NA              | NA  | NA  | NA  | NA  |
| IRD19 | benign           | yes           | pancreas       | inflammation     | NA        | NA              | NA  | NA  | NA  | NA  |
| IRD20 | NA               | NA            | NA             | NA               | NA        | NA              | NA  | NA  | NA  | NA  |
| IRD21 | NA               | NA            | NA             | NA               | NA        | NA              | NA  | NA  | NA  | NA  |
| IRD22 | atypic cells     | NA            | NA             | NA               | NA        | NA              | NA  | NA  | NA  | NA  |
| IRD23 | atypic cells     | EUS           | pancreas       | benign           | biopsy    | pancreas        | 12  | yes | no  | no  |
| IRD24 | NA               | NA            | NA             | NA               | resection | pancreas        | 75  | yes | yes | NA  |
| IRD25 | NA               | NA            | NA             | NA               | biopsy    | colon           | 60  | no  | no  | no  |
| IRD26 | benign           | NA            | NA             | NA               | resection | tumor           | 120 | yes | yes | yes |
| IRD27 | NA               | FNA           | SMG            | benign           | resection | tumor           | >50 | yes | yes | yes |
| IRD28 | NA               | NA            | NA             | NA               | biopsy    | liver           | 35  | no  | yes | yes |
| IRD29 | NA               | NA            | NA             | NA               | biopsy    | SMG             | 50  | yes | no  | yes |
| IRD30 | NA               | NA            | NA             | NA               | resection | tumor           | >20 | yes | yes | yes |
| IRD31 | benign           | FNA           | pancreas/LN    | benign           | biopsy    | bile duct       | >10 | NA  | NA  | NA  |
| IRD32 | NA               | NA            | NA             | NA               | biopsy    | prostate        | >10 | NA  | NA  | NA  |
| IRD33 | NA               | NA            | NA             | NA               | biopsy    | colon           | >50 | no  | no  | yes |
| IRD34 | benign           | NA            | NA             | NA               | biopsy    | larynx          | >10 | NA  | NA  | NA  |
| IRD41 | NA               | NA            | NA             | NA               | resection | tumor           | >50 | yes | yes | yes |
| IRD42 | NA               | NA            | NA             | NA               | NA        | NA              | NA  | NA  | NA  | NA  |
| IRD43 | NA               | US            | pancreas       | inflammation     | NA        | NA              | NA  | NA  | NA  | NA  |
| IRD44 | NA               | EUS           | pancreas       | benign           | resection | tumor           | >20 | yes | yes | yes |
| IRD45 | NA               | EUS           | pancreas       | benign           | biopsy    | pancreas        | 20  | NA  | NA  | NA  |
| IRD46 | NA               | EUS           | pancreas       | benign           | NA        | NA              | NA  | NA  | NA  | NA  |
| IRD47 | NA               | EUS           | pancreas       | benign           | NA        | NA              | NA  | NA  | NA  | NA  |
| IRD48 | NA               | NA            | NA             | NA               | NA        | NA              | NA  | NA  | NA  | NA  |
| IRD49 | atypic cells     | EUS           | pancreas       | atypic cells     | NA        | NA              | NA  | NA  | NA  | NA  |
| IRD50 | NA               | NA            | NA             | NA               | NA        | NA              | NA  | NA  | NA  | NA  |

IRD=IgG4-related disease

EUS=endoscopic ultrasound guided

US=ultrasound guided

NA=not available/applicable

\*IRD13 was diagnosed with cholangiocarcinoma 2 years after inclusion

IRD=IgG4-related disease

SMG = submandibular gland

SF= storiform fibrosis

OP= obliterative phlebitis

E= eosinophilia

NA=not available/applicable

| HISTOPATHOLOGY 2 |        |          |                 |    |    |     |
|------------------|--------|----------|-----------------|----|----|-----|
| Histology 2      |        |          |                 |    |    |     |
| ID               | Type   | Organ    | IgG4+ cells/hpf | SF | OP | E   |
| IRD01            | NA     | NA       | NA              | NA | NA | NA  |
| IRD02            | NA     | NA       | NA              | NA | NA | NA  |
| IRD03            | NA     | NA       | NA              | NA | NA | NA  |
| IRD04            | biopsy | prostate | >10             | NA | NA | NA  |
| IRD05            | biopsy | duodenum | >10             | NA | NA | NA  |
| IRD06            | testis | yes      | >15             | NA | NA | NA  |
| IRD07            | NA     | NA       | NA              | NA | NA | NA  |
| IRD08            | NA     | possibly | NA              | NA | NA | NA  |
| IRD09            | NA     | NA       | NA              | NA | NA | NA  |
| IRD10            | NA     | NA       | NA              | NA | NA | NA  |
| IRD11            | NA     | NA       | NA              | NA | NA | NA  |
| IRD12            | NA     | NA       | NA              | NA | NA | NA  |
| IRD13            | NA     | NA       | NA              | NA | NA | NA  |
| IRD14            | NA     | NA       | NA              | NA | NA | NA  |
| IRD15            | NA     | NA       | NA              | NA | NA | NA  |
| IRD16            | NA     | NA       | NA              | NA | NA | NA  |
| IRD17            | NA     | NA       | NA              | NA | NA | NA  |
| IRD18            | NA     | NA       | NA              | NA | NA | NA  |
| IRD19            | NA     | NA       | NA              | NA | NA | NA  |
| IRD20            | NA     | NA       | NA              | NA | NA | NA  |
| IRD21            | NA     | NA       | NA              | NA | NA | NA  |
| IRD22            | NA     | NA       | NA              | NA | NA | NA  |
| IRD23            | NA     | NA       | NA              | NA | NA | NA  |
| IRD24            | NA     | NA       | NA              | NA | NA | NA  |
| IRD25            | NA     | NA       | NA              | NA | NA | NA  |
| IRD26            | NA     | NA       | NA              | NA | NA | NA  |
| IRD27            | NA     | NA       | NA              | NA | NA | NA  |
| IRD28            | biopsy | colon    | >35             | no | no | no  |
| IRD29            | biopsy | LN       | 100             | no | no | no  |
| IRD30            | NA     | NA       | NA              | NA | NA | NA  |
| IRD31            | NA     | NA       | NA              | NA | NA | NA  |
| IRD32            | NA     | NA       | NA              | NA | NA | NA  |
| IRD33            | biopsy | ileum    | 50              | no | no | yes |
| IRD34            | NA     | NA       | NA              | NA | NA | NA  |
| IRD41            | biopsy | duodenum | NA              | no | no | no  |
| IRD42            | NA     | NA       | NA              | NA | NA | NA  |
| IRD43            | NA     | NA       | NA              | NA | NA | NA  |
| IRD44            | NA     | NA       | NA              | NA | NA | NA  |
| IRD45            | NA     | NA       | NA              | NA | NA | NA  |
| IRD46            | NA     | NA       | NA              | NA | NA | NA  |
| IRD47            | NA     | NA       | NA              | NA | NA | NA  |
| IRD48            | NA     | NA       | NA              | NA | NA | NA  |
| IRD49            | NA     | NA       | NA              | NA | NA | NA  |
| IRD50            | NA     | NA       | NA              | NA | NA | NA  |

IRD=IgG4-related disease  
SF= storiform fibrosis  
OP= obliterative phlebitis  
E= eosinophilia  
NA=not available/applicable

| ID    | TREATMENT 1     |                                |                                           |                      |                       | TREATMENT 2 |                                    |                               | HISORT CRITERIA<br>Group |
|-------|-----------------|--------------------------------|-------------------------------------------|----------------------|-----------------------|-------------|------------------------------------|-------------------------------|--------------------------|
|       | Biliary stents? | Resection presumed malignancy? | Resection type                            | IMT                  | Response to steroids? | Relapse     | Re-treatment with IMT              | IMT after 1 year of inclusion |                          |
| IRD01 | no              | no                             | NA                                        | pred 20mg            | yes                   | yes         | pred 20mg+aza 75mg                 | pred 7.5mg+aza 75mg           | C                        |
| IRD02 | yes             | no                             | NA                                        | pred 20mg            | yes                   | yes         | pred 5mg                           | pred 7.5mg                    | B                        |
| IRD03 | no              | no                             | NA                                        | pred 20mg            | yes                   | no          | NA                                 | aza 50 mg                     | C                        |
| IRD04 | no              | yes                            | hemihpatectomy                            | no                   | NA                    | no          | NA                                 | NA                            | A                        |
| IRD05 | no              | no                             | NA                                        | pred 20mg            | yes                   | yes         | pred 5mg+aza 75mg                  | pred 2.5mg, aza 50mg          | B                        |
| IRD06 | yes             | yes                            | PPPD                                      | pred 10mg + aza 50mg | NA (passed away)      | NA          | NA                                 | passed away                   | A                        |
| IRD07 | yes             | no                             | NA                                        | pred 20mg            | yes                   | yes         | NA                                 | NA                            | C                        |
| IRD08 | no              | no                             | NA                                        | pred 40mg            | yes                   | no          | NA                                 | no                            | B                        |
| IRD09 | yes             | no                             | NA                                        | pred 20mg            | yes                   | yes         | pred 20mg+aza 100mg                | pred 2.5mg+aza 100mg          | B                        |
| IRD10 | yes             | no                             | NA                                        | pred 20mg            | yes                   | yes         | pred 7.5mg                         | pred 5mg + MTX 10mg/w         | B                        |
| IRD11 | no              | yes                            | choledocho-jejunostomy                    | no                   | NA                    | yes         | (percutaneous dilation strictures) | no                            | A                        |
| IRD12 | yes             | yes                            | hemihpatectomy                            | pred 20mg            | yes                   | no          | NA                                 | NA                            | A                        |
| IRD13 | yes             | no                             | NA                                        | pred 10mg            | yes                   | yes         | pred 20mg                          | pred 5mg                      | C                        |
| IRD14 | yes             | yes                            | choledocho-jejunostomy                    | pred 20mg            | yes                   | no          | NA                                 | pred 5mg+aza 50mg             | A                        |
| IRD15 | yes             | no                             | NA                                        | pred 20mg            | yes                   | NA          | NA                                 | NA                            | A                        |
| IRD16 | no              | no                             | NA                                        | pred 20mg            | yes                   | yes         | pred 5mg+aza 100mg                 | pred 2.5mg+aza 50mg           | B                        |
| IRD17 | no              | no                             | NA                                        | no                   | NA                    | NA          | NA                                 | no                            | B                        |
| IRD18 | no              | no                             | NA                                        | pred 20mg            | yes                   | NA          | NA                                 | NA                            | B                        |
| IRD19 | yes             | no                             | NA                                        | pred 20mg            | yes                   | NA          | NA                                 | NA                            | C                        |
| IRD20 | no              | no                             | NA                                        | no                   | NA                    | no          | NA                                 | no                            | B                        |
| IRD21 | no              | no                             | NA                                        | pred 40mg            | yes                   | yes         | aza 1.5mg/kg                       | aza 1.5mg/kg                  | B                        |
| IRD22 | yes             | no                             | NA                                        | pred 20mg            | yes                   | no          | NA                                 | pred 2.5mg+aza 50mg           | C                        |
| IRD23 | yes             | no                             | NA                                        | pred 20mg            | yes                   | yes         | pred 20mg                          | NA                            | A                        |
| IRD24 | no              | yes                            | PPPD                                      | no                   | NA                    | NA          | NA                                 | NA                            | A                        |
| IRD25 | no              | no                             | NA                                        | pred 40mg            | yes                   | yes         | pred 40mg                          | aza                           | C                        |
| IRD26 | yes             | yes                            | pancreato-duodenectomy                    | no                   | NA                    | no          | NA                                 | NA                            | A                        |
| IRD27 | no              | yes                            | choledocho-jejunostomy                    | pred 30 mg           | yes                   | yes         | MMF 1000mg                         | MMF 1000mg                    | A                        |
| IRD28 | no              | no                             | NA                                        | pred 40mg            | yes                   | yes         | pred 30mg+MMF 1000mg               | Bud 3mg+MMF 500mg             | C                        |
| IRD29 | no              | no                             | NA                                        | pred 40mg            | yes                   | yes         | pred 40mg+MMF 1000mg               | Ritux                         | C                        |
| IRD30 | no              | yes                            | hilar resection + extended hemihpatectomy | no                   | NA                    | no          | NA                                 | NA                            | A                        |
| IRD31 | yes             | no                             | NA                                        | pred 40mg            | yes                   | no          | NA                                 | NA                            | C                        |
| IRD32 | 99              | no                             | NA                                        | pred 10mg            | yes                   | no          | NA                                 | no                            | B                        |
| IRD33 | no              | no                             | NA                                        | pred 40mg            | yes                   | yes         | aza 1,5mg/kg                       | aza                           | C                        |
| IRD34 | yes             | no                             | NA                                        | pred 20mg            | yes                   | yes         | (percutaneous dilation strictures) | no                            | C                        |
| IRD41 | no              | yes                            | pancreato-duodenectomy                    | no                   | NA                    | NA          | NA                                 | NA                            | A                        |
| IRD42 | NA              | no                             | NA                                        | pred 40mg            | yes                   | yes         | pred 20mg+aza 75mg                 | pred 5mg + aza 75mg           | C                        |
| IRD43 | yes             | no                             | NA                                        | pred 20mg            | yes                   | NA          | NA                                 | NA                            | C                        |
| IRD44 | NA              | yes                            | hemihpatectomy                            | no                   | NA                    | NA          | NA                                 | NA                            | A                        |
| IRD45 | no              | no                             | NA                                        | no                   | NA                    | NA          | NA                                 | NA                            | A                        |
| IRD46 | no              | no                             | NA                                        | pred 20mg            | yes                   | NA          | NA                                 | NA                            | B                        |
| IRD47 | no              | no                             | NA                                        | pred 20mg            | yes                   | NA          | NA                                 | NA                            | B                        |
| IRD48 | no              | no                             | NA                                        | pred 20mg            | yes                   | NA          | NA                                 | NA                            | C                        |
| IRD49 | NA              | no                             | NA                                        | pred 20mg            | yes                   | NA          | NA                                 | NA                            | C                        |
| IRD50 | no              | no                             | NA                                        | pred 20mg            | yes                   | NA          | NA                                 | NA                            | C                        |

IRD=IgG4-related disease

IMT=immunomodulatory therapy

PPPD=pylorus sparing pancreaticoduodenectomy

pred=prednisolone

aza=azathioprine

NA=not available/applicable

#### HISORT group

A= biliary/pancreatic resection or core biopsy of pancreas showing diagnostic features of IAC/AIP

B= clinical suspicion of pancreatic disease/biliary strictures + classical imaging of AIP + elevated serum IgG4

C= clinical suspicion of pancreatic disease/biliary strictures + absence of typical AIP findings

+ two of following: elevated serum IgG4; suggestive pancreatic imaging findings; other organ involvement; bile duct biopsy with >10 IgG4+ cells/hpf

+ response to steroid treatment with improvement of pancreatic morphology/biliary strictures + decrease of markers of cholestasis

## Patient characteristics – PSC/CA/CP patients

| ID    | GENERAL |       |                                                                              |     |        | SOCIAL HISTORY                                             |                     |
|-------|---------|-------|------------------------------------------------------------------------------|-----|--------|------------------------------------------------------------|---------------------|
|       | Center  | Group | Suspected organ manifestation(s)                                             | Age | Gender | Job History                                                | Relevant exposures* |
| PSC01 | British | PSC   | PSC                                                                          | 59  | M      | office worker                                              | no                  |
| PSC02 | Dutch   | PSC   | PSC                                                                          | 56  | M      | NA                                                         | NA                  |
| PSC03 | Dutch   | PSC   | PSC, CD                                                                      | 45  | M      | NA                                                         | NA                  |
| PSC04 | Dutch   | PSC   | PSC                                                                          | 44  | M      | dentist, engineer                                          | no                  |
| PSC05 | British | PSC   | PSC, CD                                                                      | 58  | M      | NA                                                         | NA                  |
| PSC06 | British | PSC   | PSC                                                                          | 75  | M      | telecommunications                                         | no                  |
| PSC07 | British | PSC   | PSC, UC                                                                      | 83  | F      | developing photographs, cleaner, catering, fish&chips shop | yes                 |
| PSC08 | British | PSC   | PSC, UC                                                                      | 59  | F      | NA                                                         | NA                  |
| PSC09 | Dutch   | PSC   | PSC, UC                                                                      | 37  | M      | IT                                                         | no                  |
| PSC10 | British | PSC   | PSC, UC                                                                      | 60  | F      | NA                                                         | NA                  |
| PSC11 | British | PSC   | PSC, UC                                                                      | 70  | M      | maintenance engineer, asbestos exposure                    | yes                 |
| PSC12 | British | PSC   | PSC, UC                                                                      | 87  | M      | NA                                                         | NA                  |
| PSC13 | Dutch   | PSC   | PSC, UC                                                                      | 32  | F      | NA                                                         | NA                  |
| PSC14 | Dutch   | PSC   | PSC                                                                          | 37  | M      | ship deconstruction industry                               | yes                 |
| PSC15 | Dutch   | PSC   | PSC, UC                                                                      | 64  | F      | NA                                                         | NA                  |
| PSC16 | Dutch   | PSC   | PSC                                                                          | 41  | F      | nurse                                                      | no                  |
| PSC17 | Dutch   | PSC   | PSC, UC                                                                      | 54  | M      | IT                                                         | no                  |
| PSC21 | Dutch   | PSC   | PSC                                                                          | 47  | F      | NA                                                         | NA                  |
| PSC22 | Dutch   | PSC   | PSC, UC                                                                      | 60  | F      | district nurse                                             | No                  |
| PSC23 | Dutch   | PSC   | PSC                                                                          | 27  | F      | student                                                    | No                  |
| PSC24 | Dutch   | PSC   | PSC                                                                          | 39  | M      | ICT                                                        | No                  |
| PSC25 | Dutch   | PSC   | PSC                                                                          | 45  | M      | office                                                     | No                  |
| PSC26 | Dutch   | PSC   | PSC, CD                                                                      | 39  | M      | office                                                     | No                  |
| PSC27 | British | PSC   | PSC, CD                                                                      | 64  | M      | Building/stone mason. Sales/retail/management              | yes                 |
| PSC28 | British | PSC   | PSC, UC                                                                      | 70  | M      | Car factory assembly line. Office electric company         | yes                 |
| PSC29 | British | PSC   | PSC                                                                          | 25  | M      | Stock management. Retail warehouse                         | yes                 |
| PSC30 | British | PSC   | PSC, UC                                                                      | 60  | M      | Design engineer. Exposed to hydraulic oil.                 | yes                 |
| PSC31 | British | PSC   | PSC, UC                                                                      | 66  | F      | Telecommunications.                                        | no                  |
| PSC32 | British | PSC   | PSC, UC                                                                      | 69  | F      | NA                                                         | NA                  |
| PSC33 | British | PSC   | PSC, UC                                                                      | 47  | F      | NA                                                         | NA                  |
| PSC34 | British | PSC   | PSC                                                                          | 35  | M      | NA                                                         | NA                  |
| PSC35 | British | PSC   | PSC                                                                          | 75  | F      | NA                                                         | NA                  |
| PSC36 | British | PSC   | PSC, UC                                                                      | 51  | F      | NA                                                         | NA                  |
| PSC37 | British | PSC   | PSC                                                                          | 60  | F      | NA                                                         | NA                  |
| PSC38 | British | PSC   | PSC                                                                          | 62  | M      | Manager                                                    | NA                  |
| PSC39 | British | PSC   | PSC                                                                          | 60  | M      | NA                                                         | NA                  |
| PSC40 | British | PSC   | PSC, Coll                                                                    | 25  | M      | NA                                                         | NA                  |
| PSC41 | British | PSC   | PSC, IC                                                                      | 50  | M      | Refuse collector. Construction                             | yes                 |
| PSC42 | British | PSC   | PSC                                                                          | 67  | M      | Business director                                          | NA                  |
| PSC43 | British | PSC   | PSC, UC                                                                      | 31  | F      | office work                                                | no                  |
| PSC44 | British | PSC   | PSC                                                                          | 28  | F      | NA                                                         | NA                  |
| PSC45 | British | PSC   | PSC                                                                          | 68  | M      | NA                                                         | NA                  |
| PSC46 | British | PSC   | PSC, UC                                                                      | 59  | M      | Insurance broker                                           | no                  |
| PSC47 | British | PSC   | PSC, UC                                                                      | 63  | M      | Sales Manager                                              | no                  |
| PSC48 | British | PSC   | PSC                                                                          | 41  | F      | Outdoor instructor. Travel.                                | yes                 |
| CA01  | Dutch   | CA    | CCA                                                                          | 54  | F      | NA                                                         | NA                  |
| CA02  | Dutch   | CA    | PCA                                                                          | 56  | M      | fast food restaurant                                       | no                  |
| CA03  | Dutch   | CA    | CCA                                                                          | 74  | M      | NA                                                         | NA                  |
| CA04  | Dutch   | CA    | CCA                                                                          | 78  | M      | NA                                                         | NA                  |
| CA05  | Dutch   | CA    | PC                                                                           | 70  | M      | crane operator                                             | yes                 |
| CA06  | Dutch   | CA    | PCA                                                                          | 70  | F      | receptionist                                               | no                  |
| CA07  | Dutch   | CA    | CCA                                                                          | 54  | M      | tax advisor                                                | no                  |
| CA08  | Dutch   | CA    | CCA                                                                          | 65  | F      | NA                                                         | NA                  |
| CA09  | Dutch   | CA    | CCA                                                                          | 72  | M      | architect                                                  | no                  |
| CA10  | Dutch   | CA    | CCA                                                                          | 66  | M      | police officer                                             | no                  |
| CA11  | Dutch   | CA    | CCA                                                                          | 47  | F      | kindergarden                                               | no                  |
| CA12  | Dutch   | CA    | PCA                                                                          | 75  | F      | house wife                                                 | no                  |
| CA13  | Dutch   | CA    | PCA                                                                          | 62  | M      | manager bank                                               | no                  |
| CA14  | Dutch   | CA    | CCA                                                                          | 72  | M      | electrician                                                | yes                 |
| CA15  | Dutch   | CA    | CCA/PCA                                                                      | 56  | F      | house cleaner                                              | no                  |
| CA16  | Dutch   | CA    | PCA                                                                          | 68  | M      | entrepreneur                                               | no                  |
| CA17  | Dutch   | CA    | CCA                                                                          | 74  | F      | assistant dentist                                          | no                  |
| CA21  | Dutch   | CA    | GCA                                                                          | 68  | F      | manager bakery                                             | No                  |
| CA22  | Dutch   | CA    | CCA                                                                          | 66  | F      | housewife                                                  | No                  |
| CA23  | Dutch   | CA    | CCA                                                                          | 71  | M      | teacher                                                    | No                  |
| CA24  | Dutch   | CA    | PCA                                                                          | 64  | M      | broker                                                     | No                  |
| CA25  | Dutch   | CA    | CCA                                                                          | 61  | M      | forklift truck driver                                      | Yes                 |
| CA26  | Dutch   | CA    | CCA                                                                          | 69  | M      | NA                                                         | NA                  |
| CA27  | Dutch   | CA    | CCA                                                                          | 61  | F      | NA                                                         | NA                  |
| CP01  | Dutch   | CP    | ischemic                                                                     | 50  | F      | NA                                                         | NA                  |
| CP02  | Dutch   | CP    | obstructive (stones)<br>recurrent severe acute pancreatitis<br>(necrotizing) | 63  | M      | electrotechnician                                          | Yes                 |
| CP03  | Dutch   | CP    | toxic (alcohol)                                                              | 56  | M      | NA                                                         | NA                  |
| CP04  | Dutch   | CP    | toxic (alcohol)                                                              | 48  | M      | maritime shipping                                          | Yes                 |
| CP05  | Dutch   | CP    | toxic (alcohol)                                                              | 61  | M      | hair dresser                                               | Yes                 |
| CP06  | Dutch   | CP    | toxic (alcohol)/obstructive (pancreas divisum)                               | 49  | F      | administration                                             | No                  |
| CP07  | Dutch   | CP    | toxic (alcohol)                                                              | 46  | M      | teaching assistant                                         | No                  |
| CP08  | Dutch   | CP    | idiopathic                                                                   | 68  | M      | NA                                                         | NA                  |
| CP09  | Dutch   | CP    | idiopathic                                                                   | 51  | F      | NA                                                         | NA                  |
| CP10  | Dutch   | CP    | obstructive (stones)                                                         | 48  | F      | NA                                                         | NA                  |

PSC=primary sclerosing cholangitis  
CA=pancreatobiliary malignancy  
CP=chronic pancreatitis  
CD=Chrohn's disease  
UC=ulcerative colitis  
CC=collagenous colitis  
CCA=cholangiocarcinoma  
PCA=pancreatic carcinoma  
GCA=gall bladder carcinoma

PC=papillary carcinoma  
M=male  
F=female

\*relevant exposure= recalled regular occupational (or non-occupational) exposures to solvents, pigments, oil products, industrial and metal dusts (> 1 year)  
NA=not available/applicable

*Patients PSC18-20 and CA18-20 have been described in detail earlier (11)*

| ID    | MEDICAL HISTORY                                                     |                      |                           |           |     |     | MEDICATIONS |      |      |
|-------|---------------------------------------------------------------------|----------------------|---------------------------|-----------|-----|-----|-------------|------|------|
|       | Presentation                                                        | Allergies            | Malignancies              | New onset |     |     | ERT for EPI | IMT  | UDCA |
|       |                                                                     |                      |                           | DM        | DM  | IBD |             |      |      |
| PSC01 | jaundice, itch, ERCP 1990                                           | no                   | no                        | no        | no  | no  | no          | no   | yes  |
| PSC02 | abnormal serum liver tests                                          | no                   | no                        | no        | no  | no  | no          | no   | yes  |
| PSC03 | colitis, abnormal serum liver tests                                 | lactose              | no                        | no        | no  | yes | no          | no   | yes  |
| PSC04 | dominant stricture                                                  | NA                   | no                        | no        | no  | no  | no          | no   | yes  |
| PSC05 | abdominal pain, abnormal serum liver tests                          | NA                   | no                        | no        | no  | yes | no          | no   | yes  |
| PSC06 | abnormal serum liver tests                                          | no                   | prostate carcinoma        | no        | no  | no  | no          | no   | no   |
| PSC07 | known UC, screening scan                                            | nuts                 | no                        | no        | no  | yes | no          | no   | no   |
| PSC08 | known UC, abnormal serum liver tests                                | NA                   | no                        | no        | no  | yes | no          | no   | yes  |
| PSC09 | fatigue, abdominal pain                                             | no                   | no                        | no        | no  | no  | no          | no   | yes  |
| PSC10 | abdominal pain, known UC, abnormal serum liver tests                | NA                   | no                        | no        | no  | yes | no          | no   | yes  |
| PSC11 | known UC, abnormal serum liver tests                                | feathers             | no                        | no        | no  | yes | no          | no   | yes  |
| PSC12 | known UC, abnormal serum liver tests                                | NA                   | lung carcinoma            | no        | no  | yes | no          | no   | yes  |
| PSC13 | itch, fatigue                                                       | NA                   | no                        | no        | no  | yes | no          | no   | yes  |
| PSC14 | abnormal serum liver tests                                          | no                   | no                        | no        | no  | no  | no          | no   | yes  |
| PSC15 | known UC, abnormal serum liver tests                                | penicillin           | colon carcinoma, melanoma | no        | no  | yes | no          | no   | yes  |
| PSC16 | joint pain, abnormal serum liver tests                              | animals              | no                        | no        | no  | no  | no          | no   | yes  |
| PSC17 | known UC, abnormal liver biochemistry                               | NA                   | no                        | no        | no  | yes | no          | no   | yes  |
| PSC21 | itch, abdominal pain, fatigue                                       | No                   | no                        | yes       | no  | no  | no          | no   | yes  |
| PSC22 | abnormal liver biochemistry                                         | No                   | no                        | no        | no  | yes | no          | no   | yes  |
| PSC23 | itch, abnormal liver biochemistry                                   | No                   | no                        | no        | no  | no  | no          | no   | yes  |
| PSC24 | itch, fatigue, abnormal liver biochemistry                          | No                   | no                        | no        | no  | no  | no          | no   | yes  |
| PSC25 | jaundice, abnormal liver biochemistry                               | NA                   | no                        | no        | no  | no  | no          | no   | yes  |
| PSC26 | abnormal liver biochemistry                                         | NA                   | no                        | no        | no  | yes | no          | no   | yes  |
| PSC27 | Jaundice, weight loss, abdominal pain                               | no                   | no                        | no        | no  | yes | no          | past | yes  |
| PSC28 | Jaundice, abdominal pain, nausea, abnorm LFTs                       | no                   | no                        | yes       | no  | no  | no          | no   | yes  |
| PSC29 | Abnormal LFTs                                                       | no                   | no                        | no        | no  | no  | no          | no   | yes  |
| PSC30 | colitis, abnormal serum liver tests                                 | no                   | no                        | no        | no  | yes | no          | no   | yes  |
| PSC31 | Colitis. Itching                                                    | no                   | no                        | no        | no  | no  | no          | no   | yes  |
| PSC32 | Fatigue, itch, abnormal LFTs                                        | hayfever             | no                        | no        | no  | no  | no          | no   | yes  |
| PSC33 | Colitis. Abnormal LFTs                                              | no                   | no                        | no        | no  | no  | no          | no   | yes  |
| PSC34 | NA                                                                  | NA                   | NA                        | NA        | NA  | no  | no          | no   | yes  |
| PSC35 | Abnormal LFTs                                                       | no                   | no                        | no        | no  | no  | no          | no   | yes  |
| PSC36 | Itching, fatigue, abdo pain, weight loss                            | asthma               | no                        | no        | no  | no  | no          | no   | yes  |
| PSC37 | Fever, cholangitis                                                  | no                   | no                        | no        | no  | yes | no          | no   | yes  |
| PSC38 | Itching                                                             | no                   | no                        | no        | no  | no  | no          | no   | yes  |
| PSC39 | Abnormal LFTs                                                       | no                   | no                        | no        | no  | yes | no          | no   | yes  |
| PSC40 | Itching, pain, fatigue, weight loss and cholangitis                 | no                   | no                        | no        | no  | no  | no          | no   | yes  |
| PSC41 | colitis, abnormal serum liver tests                                 | hayfever             | no                        | no        | no  | yes | no          | no   | yes  |
| PSC42 | Itching and fatigue                                                 | no                   | no                        | no        | no  | yes | no          | no   | yes  |
| PSC43 | Asymptomatic, abnormal LFTs. Known UC                               | no                   | no                        | no        | no  | no  | no          | no   | yes  |
| PSC44 | NA                                                                  | NA                   | NA                        | NA        | NA  | yes | no          | no   | NA   |
| PSC45 | NA                                                                  | NA                   | NA                        | NA        | NA  | no  | no          | no   | NA   |
| PSC46 | Jaundice and abnormal LFTs                                          | no                   | no                        | no        | no  | no  | no          | no   | yes  |
| PSC47 | Jaundice and abnormal LFTs                                          | wheat                | no                        | no        | no  | yes | no          | no   | yes  |
| PSC48 | Abnormal LFTs                                                       | no                   | no                        | no        | no  | no  | no          | no   | yes  |
| CA01  | abdominal discomfort, weight loss                                   | hay fever            | no                        | no        | no  | no  | no          | no   | no   |
| CA02  | obstructive jaundice, itch, abdominal pain, weight loss             | no                   | no                        | yes       | yes | no  | no          | no   | no   |
| CA03  | obstructive jaundice, abdominal pain, weight loss, nausea           | no                   | no                        | no        | no  | yes | no          | no   | no   |
| CA04  | obstructive jaundice, weight loss, nausea                           | no                   | no                        | yes       | no  | no  | no          | no   | no   |
| CA05  | obstructive jaundice, weight loss, nausea                           | no                   | no                        | yes       | no  | no  | no          | no   | no   |
| CA06  | obstructive jaundice, itch, weight loss, back pain, fatigue         | no                   | no                        | no        | no  | no  | yes         | no   | no   |
| CA07  | obstructive jaundice, weight loss                                   | antibiotics          | no                        | no        | no  | no  | no          | no   | no   |
| CA08  | obstructive jaundice, itch, abdominal pain, weight loss             | ciprofloxacin        | no                        | no        | no  | no  | no          | no   | no   |
| CA09  | obstructive jaundice, itch, abdominal pain, weight loss             | no                   | no                        | no        | no  | no  | no          | no   | no   |
| CA10  | obstructive jaundice, abdominal pain, weight loss, fatigue          | amoxicillin          | prostate carcinoma        | no        | no  | no  | no          | no   | no   |
| CA11  | obstructive jaundice, itch, abdominal pain, weight loss             | no                   | no                        | no        | no  | no  | no          | no   | no   |
| CA12  | obstructive jaundice, itch, abdominal pain, weight loss             | no                   | no                        | no        | no  | no  | no          | no   | no   |
| CA13  | obstructive jaundice, itch, weight loss, nausea                     | ampicillin           | no                        | no        | no  | no  | no          | no   | no   |
| CA14  | obstructive jaundice, itch, weight loss, nausea, fatigue            | no                   | urothelial cell carcinoma | no        | no  | no  | yes         | no   | no   |
| CA15  | abdominal pain, weight loss                                         | NA                   | no                        | no        | no  | no  | no          | no   | no   |
| CA16  | abdominal pain, weight loss                                         | NA                   | no                        | no        | no  | no  | no          | no   | no   |
| CA17  | abdominal pain, weight loss, fatigue                                | several foods        | no                        | no        | no  | no  | no          | no   | no   |
| CA21  | abdominal pain, jaundice                                            | No                   | breast carcinoma          | no        | no  | no  | no          | no   | no   |
| CA22  | obstructive jaundice, itch, weight loss                             | No                   | no                        | no        | no  | no  | no          | no   | no   |
| CA23  | obstructive jaundice, itch                                          | No                   | no                        | no        | no  | no  | no          | no   | no   |
| CA24  | obstructive jaundice, itch, abdominal pain                          | No                   | urothelial cell carcinoma | no        | no  | no  | no          | no   | no   |
| CA25  | obstructive jaundice, weight loss, itch                             | No                   | no                        | no        | no  | no  | no          | no   | no   |
| CA26  | weight loss, itch                                                   | latex                | no                        | no        | no  | no  | yes         | no   | no   |
| CA27  | obstructive jaundice, weight loss, itch, fatigue                    | No                   | no                        | yes       | no  | no  | no          | no   | no   |
| CP01  | epigastric pain radiating to back, nausea, vomiting, nicotine abuse | codeine              | no                        | no        | no  | no  | no          | no   | no   |
| CP02  | epigastric pain, weight loss                                        | No                   | no                        | yes       | yes | no  | yes         | no   | no   |
| CP03  | weight loss, abdominal pain                                         | contrast fluid       | no                        | yes       | yes | no  | yes         | no   | no   |
| CP04  | weight loss, abdominal pain, alcohol abuse                          | No                   | no                        | yes       | yes | no  | yes         | no   | no   |
| CP05  | epigastric pain radiating to back, alcohol abuse                    | tramadol, diclofenac | no                        | no        | no  | no  | yes         | no   | no   |
| CP06  | epigastric pain, nausea, vomiting, alcohol abuse                    | No                   | no                        | yes       | yes | no  | yes         | no   | no   |
| CP07  | epigastric pain radiating to back, nausea, vomiting, alcohol abuse  | No                   | no                        | yes       | yes | no  | no          | no   | no   |
| CP08  | epigastric pain, weight loss                                        | No                   | rectum carcinoma          | no        | no  | no  | yes         | no   | no   |
| CP09  | epigastric pain, weight loss, nausea, vomiting, nicotine abuse      | NA                   | no                        | yes       | no  | no  | yes         | no   | no   |
| CP10  | epigastric pain radiating to back, weight loss                      | NA                   | no                        | no        | no  | no  | yes         | no   | no   |

PSC=primary sclerosing cholangitis  
CA=pancreatobiliary malignancy  
CP=chronic pancreatitis  
DM=diabetes mellitus  
IBD=inflammatory bowel disease  
ERT= Enzyme replacement  
EPI=exocrine pancreatic insufficiency  
IMT=immunomodulatory therapy  
UDCA=ursodeoxycholic acid  
UC=ulcerative colitis  
NA=not available/applicable

| ID    | LABORATORY FINDINGS 1<br>Pre-treatment |     |      |      |      |        |        |      |      |      |      |          |                 |              |      | Auto-antibodies |        |
|-------|----------------------------------------|-----|------|------|------|--------|--------|------|------|------|------|----------|-----------------|--------------|------|-----------------|--------|
|       | Bilirubin                              | AST | ALT  | ALP  | GGT  | lipase | CA19.9 | IgG1 | IgG2 | IgG3 | IgG4 | IgGtotal | IgG4:IgG1 ratio | IgG4 highest | qPCR | ANA             | ANCA   |
| PSC01 | 16                                     | 24  | 63   | 422  | 54   | NA     | 30     | 8,27 | 4,26 | 0,46 | 1,09 | 13,5     | 0,132           | 1,09         | 1,21 | no              | no     |
| PSC02 | 36                                     | 120 | 131  | 369  | 172  | 50     | 39     | 11,1 | 3,75 | 0,97 | 0,62 | 14,7     | 0,056           | 0,81         | 2,90 | no              | atypic |
| PSC03 | 9                                      | 40  | 62   | 228  | 230  | 40     | 4      | 11,7 | 4,48 | 0,34 | 0,77 | 17,1     | 0,066           | 0,04         | 3,68 | yes             | atypic |
| PSC04 | 6                                      | 27  | 35   | 251  | 63   | NA     | NA     | 10,4 | 5,63 | 0,75 | 1,03 | 15,3     | 0,099           | 1,03         | 0,35 | NA              | NA     |
| PSC05 | 28                                     | 26  | 82   | 614  | 351  | NA     | 7      | 9,41 | 3,19 | 1,29 | 1    | 13,5     | 0,106           | 1            | 3,13 | no              | P-ANCA |
| PSC06 | 4                                      | NA  | 16   | 223  | 152  | NA     | NA     | 9,31 | NA   | NA   | 1,55 | 14       | 0,166           | 1,55         | 1,14 | NA              | NA     |
| PSC07 | 7                                      | NA  | 12   | 131  | 19   | NA     | 16     | 13,6 | 4,61 | 2,6  | 1,68 | 17       | 0,124           | 1,68         | 1,51 | no              | P-ANCA |
| PSC08 | 5                                      | NA  | 23   | 271  | 114  | NA     | 6      | 7,72 | NA   | NA   | 0,86 | 14,8     | 0,111           | 0,86         | 1,68 | 8               | no     |
| PSC09 | 20                                     | 90  | 64   | 283  | 68   | 23     | 34     | 15,9 | 3,61 | 0,64 | 0,83 | 21       | 0,052           | 0,83         | 2,57 | unclear         | p-ANCA |
| PSC10 | 24                                     | 20  | 21   | 117  | 28   | NA     | 15     | 6,35 | 2,14 | 0,1  | 0,09 | 9,46     | 0,014           | 0,09         | 0,95 | NA              | NA     |
| PSC11 | 12                                     | 24  | 52   | 426  | 77   | NA     | 12     | 6,26 | 2,93 | 0,21 | 0,19 | 9,8      | 0,030           | 0,19         | 1,00 | no              | no     |
| PSC12 | 8                                      | NA  | 17   | 263  | 35   | NA     | 2      | 16,5 | 2,44 | 0,57 | 1,81 | 19,8     | 0,110           | 1,81         | 1,41 | no              | P-ANCA |
| PSC13 | 8                                      | 60  | 53   | 320  | 55   | 28     | 14     | 20,5 | 5,77 | 0,27 | 3,33 | 29,1     | 0,162           | 3,33         | 3,93 | no              | NA     |
| PSC14 | 21                                     | 237 | 370  | 270  | 2995 | 75     | 15     | 7,87 | 3,48 | 1,17 | 1,7  | 11,4     | 0,216           | 1,73         | 1,95 | yes             | NA     |
| PSC15 | 9                                      | 28  | 24   | 162  | 54   | 23     | 6      | 9,39 | 2,73 | 0,38 | 0,24 | 12,2     | 0,026           | 0,24         | 0,10 | yes             | NA     |
| PSC16 | 6                                      | 74  | 108  | 724  | 185  | 51     | 96     | 10,3 | 1,33 | 0,29 | 0,05 | 12,2     | 0,005           | 0,05         | 1,76 | yes             | atypic |
| PSC17 | 7                                      | 39  | 49   | 146  | 144  | 49     | 8      | 9,71 | 1,18 | 0,35 | 0,09 | 11,5     | 0,009           | 0,09         | 0,78 | no              | no     |
| PSC21 | 9                                      | 43  | 49   | 379  | 157  | NA     | 24     | 16,2 | 4,44 | 0,51 | 3,55 | 3,38     | 0,219           | 3,69         | 1,40 | yes             | no     |
| PSC22 | 19                                     | 36  | 24   | 140  | 16   | 37     | 11     | 8,40 | 3,52 | 0,41 | 0,04 | 12,4     | 0,005           | 0,04         | 0,34 | no              | atypic |
| PSC23 | 8                                      | 68  | 66   | 309  | 78   | NA     | 16     | 7,2  | 1,96 | 0,26 | 0,37 | 9,4      | 0,051           | 0,41         | 2,99 | yes             | 9999   |
| PSC24 | 12                                     | 96  | 191  | 433  | 233  | 42     | 39     | 10,1 | 2,8  | 0,37 | 0,01 | 13,7     | 0,001           | 0,01         | 2,05 | no              | p-ANCA |
| PSC25 | 10                                     | 55  | 104  | 109  | 315  | 28     | 8      | 7,53 | 1,71 | 0,3  | 0,24 | 8,9      | 0,032           | 0,24         | 1,28 | no              | NA     |
| PSC26 | 12                                     | 35  | 50   | 195  | 111  | 31     | 24     | 6,94 | 2,43 | 0,36 | 0,66 | 9,2      | 0,095           | 0,66         | 1,42 | NA              | NA     |
| PSC27 | 72                                     | NA  | 36   | 901  | NA   | 78     | 9      | 7,29 | NA   | NA   | 2,87 | 14,9     | 0,394           | 2,87         | 2,49 | no              | no     |
| PSC28 | 374                                    | NA  | 76   | 1607 | NA   | NA     | 13     | 8,11 | NA   | NA   | 2,48 | 11,4     | 0,306           | 2,48         | 4,46 | no              | no     |
| PSC29 | 12                                     | NA  | 119  | 711  | NA   | 90     | NA     | 15   | NA   | NA   | 1,66 | 25       | 0,111           | 1,66         | 1,63 | yes             | NA     |
| PSC30 | NA                                     | NA  | NA   | NA   | NA   | NA     | norm   | 14,6 | NA   | NA   | 4,35 | 18,4     | 0,298           | 4,35         | 1,53 | no              | P-ANCA |
| PSC31 | 8                                      | NA  | 16   | 230  | 14   | NA     | 18     | 6,7  | NA   | NA   | 0,32 | 8,8      | 0,048           | 0,32         | 0,72 | no              | NA     |
| PSC32 | 5                                      | NA  | 11   | 543  | 36   | 113    | 6      | 15   | NA   | NA   | 0,01 | 19       | 0,001           | 0,01         | 0,16 | NA              | NA     |
| PSC33 | 8                                      | NA  | 108  | 990  | 430  | NA     | 8      | 7    | NA   | NA   | 0,27 | 9,9      | 0,039           | 0,27         | 0,98 | no              | P-ANCA |
| PSC34 | 9                                      | NA  | 57   | 331  | 207  | NA     | 10     | NA   | NA   | NA   | 0,05 | 5,5      | NA              | 0,05         | 0,41 | no              | NA     |
| PSC35 | 10                                     | NA  | 21   | 164  | NA   | NA     | NA     | NA   | NA   | NA   | 0,44 | 12       | 3,912           | 0,44         | 4,79 | no              | NA     |
| PSC36 | 6                                      | NA  | 80   | 307  | NA   | NA     | 17     | 6,28 | NA   | NA   | 0,49 | 10,5     | 0,066           | 0,49         | 0,41 | yes             | NA     |
| PSC37 | 14                                     | NA  | 21   | 258  | 46   | NA     | 14     | 10,5 | NA   | NA   | 0,63 | 12,7     | 3,912           | 0,63         | 4,62 | no              | NA     |
| PSC38 | 19                                     | NA  | 22   | 295  | NA   | NA     | 15     | 14   | NA   | NA   | 0,21 | 14,2     | 0,066           | 0,21         | 3,32 | no              | P-ANCA |
| PSC39 | 14                                     | NA  | 28   | 304  | 86   | NA     | 13     | 13,7 | NA   | NA   | 0,93 | 17,1     | 3,912           | 0,93         | 3,06 | no              | NA     |
| PSC40 | 59                                     | NA  | 2046 | 394  | 572  | NA     | 31     | 7,6  | NA   | NA   | 0,36 | 11,3     | 0,066           | 0,36         | 1,72 | yes             | no     |
| PSC41 | 10                                     | NA  | 53   | 427  | 201  | 102    | 12     | 15,6 | NA   | NA   | 2,04 | 22,8     | 3,912           | 2,04         | 3,81 | yes             | P-ANCA |
| PSC42 | 21                                     | NA  | 116  | 487  | 771  | NA     | 25     | 10,9 | NA   | NA   | 0,6  | 14,6     | 0,066           | 0,6          | 2,26 | yes             | NA     |
| PSC43 | 13                                     | NA  | 33   | 345  | 123  | NA     | 13     | NA   | NA   | NA   | 0,11 | 18,8     | NA              | 0,11         | 1,18 | no              | NA     |
| PSC44 | NA                                     | NA  | NA   | NA   | NA   | NA     | NA     | NA   | NA   | NA   | 0,08 | NA       | NA              | 0,08         | 0,06 | NA              | NA     |
| PSC45 | NA                                     | NA  | NA   | NA   | NA   | NA     | NA     | NA   | NA   | NA   | 0,39 | NA       | NA              | 0,39         | 0,29 | NA              | NA     |
| PSC46 | 24                                     | NA  | 26   | 111  | 35   | NA     | 5      | 6,90 | NA   | NA   | 3,01 | 13       | 0,436           | 3,01         | 4,10 | yes             | P-ANCA |
| PSC47 | 82                                     | NA  | 106  | 1627 | 536  | 26     | 45     | 15,3 | NA   | NA   | 2,27 | 20       | 3,912           | 2,27         | 5,93 | yes             | P-ANCA |
| PSC48 | 8                                      | NA  | 33   | 235  | 39   | 22     | normal | 7,5  | NA   | NA   | 1,69 | 11,6     | 0,066           | 1,69         | 1,08 | yes             | no     |
| CA01  | 20                                     | 56  | 80   | 283  | 382  | 182    | 236    | 6,77 | 2,84 | 0,63 | 0,45 | 10,2     | 0,066           | 0,45         | 1,59 | NA              | NA     |
| CA02  | 76                                     | 114 | 198  | 554  | 1252 | 3302   | 91     | 5,92 | 4,45 | 0,45 | 0,86 | 10,2     | 0,145           | 0,86         | 1,73 | NA              | NA     |
| CA03  | 22                                     | 57  | 81   | 298  | 846  | NA     | NA     | 7,28 | 0,16 | 0,32 | 0    | 7,4      | 0,000           | 0            | 3,88 | NA              | NA     |
| CA04  | 14                                     | 37  | 40   | 215  | 485  | 124    | 87     | 10,4 | 2,22 | 0,79 | 0,28 | 13,2     | 0,027           | 0,28         | 0,75 | NA              | NA     |
| CA05  | 36                                     | 22  | 35   | 246  | 489  | 97     | 45     | 7,29 | 3,34 | 0,19 | 0,73 | 10,5     | 0,100           | 0,73         | 1,50 | NA              | NA     |
| CA06  | 30                                     | 56  | 75   | 615  | 457  | 9      | 1270   | 7,26 | 3    | 0,24 | 1,39 | 9,8      | 0,191           | 1,39         | 3,41 | NA              | NA     |
| CA07  | 28                                     | 63  | 72   | 121  | 301  | 137    | 34     | 11,2 | 3,41 | 0,31 | 0,7  | 14,3     | 0,063           | 0,7          | 0,81 | NA              | NA     |
| CA08  | 41                                     | 80  | 86   | 326  | 328  | 28     | 360    | 9,1  | 4,29 | 0,49 | 0,43 | 12,8     | 0,047           | 0,43         | 3,63 | NA              | NA     |
| CA09  | 192                                    | 47  | 48   | 252  | 258  | 49     | 67     | 4,87 | 3,35 | 0,17 | 0,88 | 10,1     | 0,181           | 0,88         | 3,79 | NA              | NA     |
| CA10  | 103                                    | 64  | 84   | 351  | 256  | 76     | 107    | 6,89 | 2,02 | 0,36 | 0,26 | 9,1      | 0,038           | 0,26         | 0,58 | NA              | NA     |
| CA11  | 40                                     | 126 | 57   | 679  | 585  | 39     | 161    | 10,1 | 2,18 | 0,2  | 0,15 | 13       | 0,015           | 0,22         | 0,17 | NA              | NA     |
| CA12  | 109                                    | 234 | 370  | 1210 | 2416 | 201    | 221    | 5,27 | 3,69 | 0,36 | 1,9  | 9,9      | 0,361           | 1,9          | 1,97 | NA              | NA     |
| CA13  | 326                                    | 100 | 175  | 341  | 419  | 154    | 370    | 3,49 | 2,66 | 0,15 | 0,33 | 7,6      | 0,095           | 0,33         | 0,53 | NA              | NA     |
| CA14  | 396                                    | 193 | 229  | 496  | 572  | 62     | 2383   | 9,67 | 2,43 | 0,42 | 0,58 | 11,8     | 0,060           | 0,58         | 4,24 | NA              | NA     |
| CA15  | 13                                     | 52  | 41   | 926  | 895  | 43     | 795    | 11,6 | 6,32 | 0,97 | 1,54 | 17,8     | 0,133           | 1,54         | 2,19 | NA              | NA     |
| CA16  | 8                                      | 23  | 33   | 112  | 91   | 44     | 2598   | 5,58 | 3,7  | 0,38 | 1,09 | 9,7      | 0,195           | 1,09         | 2,36 | NA              | NA     |
| CA17  | 9                                      | 30  | 30   | 323  | 766  | 33     | 2568   | 7    | 1,72 | 0,31 | 0,3  | 9        | 0,043           | 0,3          | 1,95 | NA              | NA     |
| CA21  | 20                                     | 107 | 350  | 1023 | 1323 | 37     | 1033   | 5,91 | 4,04 | 0,42 | 0,61 | 10,7     | 0,103           | 0,61         | 1,59 | NA              | NA     |
| CA22  | 61                                     | 73  | 85   | 716  | 1559 | 32     | 184    | 8,87 | 4,49 | 0,84 | 0,67 | 13       | 0,076           | 0,67         | 0,70 | NA              | NA     |
| CA23  | 14                                     | 56  | 85   | 278  | 981  | 20     | 30     | 5,14 | 4,03 | 0,39 | 0,72 | 9,5      | 0,140           | 0,74         | 2,44 | NA              | NA     |
| CA24  | 18                                     | 23  | 30   | 92   | 71   | 71     | 11     | 10,4 | 0,44 | 0,63 | 0,03 | 12,5     | 0,003           | 0,03         | 0,52 | NA              | NA     |
| CA25  | 38                                     | 37  | 70   | 161  | 67   | 33     | 24     | 6,18 | 3,04 | 0,29 | 1,71 | 1,71     | 0,277           | 1,81         | 3,25 | NA              | NA     |
| CA26  | 81                                     | 119 | 135  | 860  | 519  | 26     | NA     | 7,02 | 4,4  | 0,37 | 0,26 | 11,3     | 0,037           | 0,26         | 1,22 | NA              | NA     |
| CA27  | 22                                     | 107 | 106  | 402  | 1329 | 27     | 4207   | 9,25 | 3,28 | 0,35 | 1,34 | 12       | 0,145           | 1,34         | 1,04 | NA              | NA     |
| CP01  | 4                                      | 10  | 8    | 164  | 35   | 80     | 9      | 8,63 | 1,98 | 0,43 | 0,79 | 10,4     | 0,092           | 0,79         | 2,40 | NA              | NA     |
| CP02  | 14                                     | 57  | 80   | 534  | 409  | 11     | 12     | 8,73 | 3,09 | 0,58 | 0,97 | 11,9     | 0,111           | 0,97         | 1,21 | NA              | NA     |
| CP03  | 8                                      | 52  | 91   | 383  | 405  | 9      | 17     | 6,17 | 4,38 | 0,39 | 0,56 | 10,3     | 0,091           | 0,56         | 1,65 | NA              | NA     |
| CP04  | 7                                      | 19  | 21   | 97   | 190  | 87     | 75     | 5,84 | 4,98 | 1,45 | 1,82 | 11,4     | 0,312           | 1,88         | 4,25 | NA              | NA     |
| CP05  | 10                                     | 21  | 14   | 88   | 40   | 82     | 9      | 8,53 | 1,25 | 0,28 | 0,26 | 9,9      | 0,030           | 0,26         | 2,25 | NA              | NA     |
| CP06  | 3                                      | 21  | 16   | 40   | 12   | 16     | 8      | 5,41 | 1,04 | 0,11 | 0,09 | 6,5      | 0,017           | 0,09         | 2,21 | NA              | NA     |
| CP07  | 9                                      | 191 | 138  | 452  | 2055 | 13     | 81     | 7    | 2,2  | 1,01 | 1,09 | 9,6      | 0,156           | 1,09         | 6,45 | NA              | NA     |
| CP08  | 2                                      | 15  | 16   | 92   | 75   | 29     | 0      | 3,84 | 3,14 | 0,61 | 0,4  | 7        | 0,104           | 0,4          | 1,40 | NA              | NA     |
| CP09  | 4                                      | 41  | 58   | 160  | 227  | 14     | 1      | 4,08 | 0,76 | 0,06 | 0,41 | 5        | 0,100           | 0,41         | 3,71 | NA              | NA     |
| CP10  | 6                                      | 12  | 9    | 109  | 17   | 33     | 68     | 8,42 | 3,36 | 0,98 | 0,79 | 12       | 0,094           | 0,79         | 2,91 | NA              | NA     |

PSC=primary sclerosing cholangitis  
CA=pancreatobiliary malignancy  
CP=chronic pancreatitis  
AST=aspartate aminotransferase  
ALT=alanine aminotransferase  
ALP=alkaline phosphatase  
GGT=gamma-glutamyl transferase

CA19.9=carbonic anhydrase 19.9  
IgG=Immunoglobulin G  
qPCR=quantitative PCR  
NA=not available/applicable



| IMAGING 1 |                          |                                   |                         |                                   |                                      |                                      |
|-----------|--------------------------|-----------------------------------|-------------------------|-----------------------------------|--------------------------------------|--------------------------------------|
| ID        | Type                     | Localization stenosis/obstruction | Suspect for malignancy? | Malignancy type                   | Suspect for sclerosing cholangitis?* | Lymphadenopathy                      |
| PSC01     | ERCP, MRCP, CT, AUS      | none                              | no                      | NA                                | yes                                  | NA                                   |
| PSC02     | MRCP, ERCP               | multifocal                        | no                      | NA                                | yes                                  | NA                                   |
| PSC03     | MRCP                     | multifocal (IHBD)                 | no                      | NA                                | yes                                  | NA                                   |
| PSC04     | ERCP                     | multifocal                        | no                      | NA                                | yes                                  | NA                                   |
| PSC05     | MRCP, ERCP, CT           | none                              | no                      | NA                                | yes                                  | NA                                   |
| PSC06     | MRCP, AUS                | DCBD/PD                           | yes                     | CCA                               | yes                                  | no                                   |
| PSC07     | MRCP, CT                 | none                              | yes                     | CCA                               | yes                                  | locoregional                         |
| PSC08     | MRCP, US                 | none                              | no                      | NA                                | yes                                  | NA                                   |
| PSC09     | CT, MRCP, ERCP           | multifocal                        | no                      | NA                                | yes                                  | NA                                   |
| PSC10     | MRCP, AUS                | CBD                               | no                      | NA                                | yes                                  | NA                                   |
| PSC11     | MRCP, ERCP, AUS, CT      | hilar                             | no                      | NA                                | yes                                  | NA                                   |
| PSC12     | MRCP, CT, AUS            | none                              | no                      | NA                                | yes                                  | NA                                   |
| PSC13     | MRCP, ERCP               | multifocal (IHBD)                 | no                      | NA                                | yes                                  | NA                                   |
| PSC14     | MRCP, ERCP               | CBD                               | no                      | NA                                | yes                                  | NA                                   |
| PSC15     | MRCP, AUS                | multifocal                        | no                      | NA                                | yes                                  | NA                                   |
| PSC16     | MRCP, ERCP               | IHBD                              | no                      | NA                                | yes                                  | NA                                   |
| PSC17     | CT, MRCP                 | CBD                               | no                      | NA                                | yes                                  | NA                                   |
| PSC21     | MRCP, ERCP, AUS          | multifocal                        | no                      | NA                                | yes                                  | no                                   |
| PSC22     | MRCP                     | multifocal                        | no                      | NA                                | yes                                  | NA                                   |
| PSC23     | MRCP                     | multifocal (IHBD)                 | no                      | NA                                | yes                                  | NA                                   |
| PSC24     | MRCP, ERCP               | multifocal                        | no                      | NA                                | yes                                  | locoregional                         |
| PSC25     | MRCP, AUS                | multifocal (IHBD)                 | no                      | NA                                | yes                                  | no                                   |
| PSC26     | MRCP, AUS                | multifocal (IHBD)                 | no                      | NA                                | yes                                  | NA                                   |
| PSC27     | ERCP, MRCP, CT           | IHD                               | no                      | NA                                | yes                                  | no                                   |
| PSC28     | MRCP, AUS, ERCP, CT      | CHD, LIHD                         | no                      | NA                                | yes                                  | no                                   |
| PSC29     | MRCP                     | none                              | no                      | NA                                | yes                                  | no                                   |
| PSC30     | ERCP, MRCP, CT, AUS      | IHD and EHD                       | no                      | NA                                | yes                                  | yes                                  |
| PSC31     | ERCP, MRCP               | EHD and IHD                       | no                      | NA                                | yes                                  | no                                   |
| PSC32     | MRCP, AUS                | IHD                               | no                      | NA                                | yes                                  | no                                   |
| PSC33     | MRCP                     | IHD and EHD                       | no                      | NA                                | yes                                  | no                                   |
| PSC34     | NA                       | NA                                | NA                      | NA                                | NA                                   | NA                                   |
| PSC35     | MRCP                     | IHD                               | no                      | NA                                | yes                                  | no                                   |
| PSC36     | MRCP, ERCP, AUS          | IHD and EHD                       | no                      | NA                                | yes                                  | yes                                  |
| PSC37     | MRCP                     | IHD                               | no                      | NA                                | yes                                  | no                                   |
| PSC38     | MRCP, AUS                | EHD and IHD                       | no                      | NA                                | yes                                  | no                                   |
| PSC39     | MRCP                     | none                              | no                      | NA                                | yes                                  | no                                   |
| PSC40     | ERCP, MRCP, AUS          | EHD and IHD                       | no                      | NA                                | yes                                  | no                                   |
| PSC41     | ERCP, MRCP, AUS          | IHD                               | no                      | NA                                | yes                                  | no                                   |
| PSC42     | MRCP, AUS                | IHD                               | no                      | NA                                | yes                                  | no                                   |
| PSC43     | MRCP, AUS                | IHD                               | no                      | NA                                | yes                                  | no                                   |
| PSC44     | NA                       | NA                                | NA                      | NA                                | NA                                   | NA                                   |
| PSC45     | NA                       | NA                                | NA                      | NA                                | NA                                   | NA                                   |
| PSC46     | ERCP, MRCP               | CHD/LHD                           | no                      | NA                                | yes                                  | no                                   |
| PSC47     | MRCP, CT                 | IHD/EHD                           | no                      | NA                                | yes                                  | no                                   |
| PSC48     | MRCP, CT                 | none                              | no                      | NA                                | yes                                  | no                                   |
| CA01      | CT                       | Hilar                             | yes                     | Klatskin tumour Bismuth type IV   | no                                   | no                                   |
| CA02      | CT, ERCP                 | DCBD                              | yes                     | PCA                               | no                                   | locoregional                         |
| CA03      | CT, MRI                  | Hilar                             | yes                     | Klatskin tumour Bismuth type IV   | no                                   | locoregional                         |
| CA04      | CT, MRI                  | Hilar                             | yes                     | Klatskin tumour Bismuth type IIIa | no                                   | locoregional, retroperitoneal        |
| CA05      | CT, MRI, EUS             | DCBD                              | yes                     | papillary carcinoma               | no                                   | no                                   |
| CA06      | CT, ERCP                 | DCBD                              | yes                     | PCA                               | no                                   | locoregional, lungs                  |
| CA07      | CT                       | Hilar                             | yes                     | Klatskin tumour Bismuth type IIIa | no                                   | locoregional                         |
| CA08      | CT, MRI, ERCP            | hilar                             | yes                     | Klatskin tumour Bismuth type IV   | no                                   | locoregional                         |
| CA09      | CT, MRI, ERCP            | DCBD                              | yes                     | distal CCA                        | no                                   | no                                   |
| CA10      | CT, ERCP                 | Hilar                             | yes                     | Klatskin tumour Bismuth type IIIa | no                                   | locoregional                         |
| CA11      | CT                       | hilar                             | yes                     | Klatskin tumour Bismuth type IV   | no                                   | locoregional                         |
| CA12      | CT, EUS                  | DCBD                              | yes                     | PCA                               | no                                   | locoregional                         |
| CA13      | CT, MRI, ERCP            | DCBD                              | yes                     | PC                                | no                                   | no                                   |
| CA14      | CT, MRCP, ERCP           | hilar                             | yes                     | Klatskin tumour Bismuth type IV   | no                                   | locoregional                         |
| CA15      | CT, MRCP                 | hilar                             | yes                     | CCA/PCA                           | no                                   | locoregional                         |
| CA16      | CT, EUS                  | none                              | yes                     | PCA                               | no                                   | locoregional                         |
| CA17      | CT, MRI                  | hilar                             | yes                     | Klatskin tumour Bismuth type IIIb | no                                   | locoregional, abdominal, paracardial |
| CA21      | CT                       | DCBD, Hilar                       | yes                     | Gall bladder cancer               | no                                   | no                                   |
| CA22      | CT, MRI, ERCP            | Hilar                             | yes                     | Klatskin type IV                  | no                                   | no                                   |
| CA23      | CT, MRCP, ERCP           | hilar                             | yes                     | Klatskin type IIIa                | no                                   | no                                   |
| CA24      | CT, ERCP                 | DCBD                              | yes                     | PCA                               | no                                   | locoregional                         |
| CA25      | CT, ERCP, AUS            | Hilar                             | yes                     | Klatskin type IIIa/IV             | no                                   | locoregional                         |
| CA26      | CT, ERCP, AUS            | hilar                             | yes                     | Klatskin type IV                  | no                                   | no                                   |
| CA27      | CT, MRI, ERCP, AUS       | hilar                             | yes                     | Klatskin type IIIa                | no                                   | no                                   |
| CP01      | CT, AUS                  | NA                                | yes                     | NA                                | no                                   | no                                   |
| CP02      | CT, ERCP, EUS            | DCBD/IP                           | yes                     | PCA                               | no                                   | locoregional                         |
| CP03      | CT, MRI, ERCP, AUS       | DCBC                              | yes                     | 7777                              | no                                   | locoregional                         |
| CP04      | CT, EUS                  | IP                                | yes                     | PCA                               | no                                   | locoregional                         |
| CP05      | CT, MRCP, ERCP, EUS, AUS | DCBD                              | yes                     | PCA                               | no                                   | no                                   |
| CP06      | CT, MRCP, ERCP, AUS      | IP                                | yes                     | PCA                               | no                                   | no                                   |
| CP07      | CT, ERCP, AUS            | IP                                | yes                     | NA                                | no                                   | no                                   |
| CP08      | CT, MRI, ERCP, EUS       | IP                                | yes                     | NA                                | no                                   | locoregional                         |
| CP09      | CT, MRI, AUS             | NA                                | yes                     | NA                                | no                                   | no                                   |
| CP10      | CT, MRI                  | DCBD/IP                           | yes                     | NA                                | no                                   | no                                   |

PSC=primary sclerosing cholangitis

CA=pancreatobiliary malignancy

CP=chronic pancreatitis

CT=computed tomography

MRI=magnetic resonance imaging

MRCP=magnetic resonance cholangiopancreatography

ERCP=endoscopic retrograde cholangiopancreatography

PET=positron emission tomography

AUS=abdominal ultrasound

EUS=endoscopic ultrasound

IHBD=intra hepatic bile ducts

CBD=common bile duct

DCBD= distal CBD

PD = pancreatic duct

NA=not available/applicable

| ID    | HISTOPATHOLOGY 1        |               |                      |                    |
|-------|-------------------------|---------------|----------------------|--------------------|
|       | Cytology 1              |               | Cytology 2           |                    |
|       | Biliary brushing        | Function type | Function organ       | Function outcome   |
| PSC01 | NA                      | NA            | NA                   | NA                 |
| PSC02 | atypic cells (reactive) | NA            | NA                   | NA                 |
| PSC03 | NA                      | NA            | NA                   | NA                 |
| PSC04 | NA                      | NA            | NA                   | NA                 |
| PSC05 | NA                      | NA            | NA                   | NA                 |
| PSC06 | NA                      | NA            | NA                   | NA                 |
| PSC07 | NA                      | NA            | NA                   | NA                 |
| PSC08 | NA                      | NA            | NA                   | NA                 |
| PSC09 | atypic cells (reactive) | NA            | NA                   | NA                 |
| PSC10 | NA                      | NA            | NA                   | NA                 |
| PSC11 | benign                  | NA            | NA                   | NA                 |
| PSC12 | NA                      | NA            | NA                   | NA                 |
| PSC13 | NA                      | NA            | NA                   | NA                 |
| PSC14 | benign                  | NA            | NA                   | NA                 |
| PSC15 | NA                      | NA            | NA                   | NA                 |
| PSC16 | NA                      | NA            | NA                   | NA                 |
| PSC17 | NA                      | NA            | NA                   | NA                 |
| PSC21 | inflammation            | NA            | NA                   | NA                 |
| PSC22 | NA                      | NA            | NA                   | NA                 |
| PSC23 | NA                      | NA            | NA                   | NA                 |
| PSC24 | inflammation            | NA            | NA                   | NA                 |
| PSC25 | NA                      | NA            | NA                   | NA                 |
| PSC26 | NA                      | NA            | NA                   | NA                 |
| PSC27 | NA                      | NA            | NA                   | NA                 |
| PSC28 | benign                  | NA            | NA                   | NA                 |
| PSC29 | NA                      | NA            | NA                   | NA                 |
| PSC30 | NA                      | NA            | NA                   | NA                 |
| PSC31 | NA                      | NA            | NA                   | NA                 |
| PSC32 | NA                      | NA            | NA                   | NA                 |
| PSC33 | NA                      | NA            | NA                   | NA                 |
| PSC34 | NA                      | NA            | NA                   | NA                 |
| PSC35 | NA                      | NA            | NA                   | NA                 |
| PSC36 | benign                  | NA            | NA                   | NA                 |
| PSC37 | NA                      | NA            | NA                   | NA                 |
| PSC38 | NA                      | NA            | NA                   | NA                 |
| PSC39 | NA                      | NA            | NA                   | NA                 |
| PSC40 | benign                  | NA            | NA                   | NA                 |
| PSC41 | NA                      | NA            | NA                   | NA                 |
| PSC42 | NA                      | NA            | NA                   | NA                 |
| PSC43 | NA                      | NA            | NA                   | NA                 |
| PSC44 | NA                      | NA            | NA                   | NA                 |
| PSC45 | NA                      | NA            | NA                   | NA                 |
| PSC46 | NA                      | NA            | NA                   | NA                 |
| PSC47 | NA                      | NA            | NA                   | NA                 |
| PSC48 | NA                      | NA            | NA                   | NA                 |
| CA01  | NA                      | NA            | NA                   | NA                 |
| CA02  | NA                      | US            | liver                | adenocarcinoma     |
| CA03  | adenocarcinoma          | NA            | NA                   | NA                 |
| CA04  | normal                  | NA            | NA                   | NA                 |
| CA05  | NA                      | EUS           | tumor                | adenocarcinoma     |
| CA06  | adenocarcinoma          | NA            | NA                   | NA                 |
| CA07  | adenocarcinoma          | NA            | NA                   | NA                 |
| CA08  | atypic cells            | US            | abdominal lymph node | benign             |
| CA09  | normal                  | NA            | NA                   | NA                 |
| CA10  | insufficient material   | NA            | NA                   | NA                 |
| CA11  | NA                      | US            | abdominal lymph node | benign             |
| CA12  | atypic cells            | EUS           | pancreas head        | unclear            |
| CA13  | NA                      | NA            | NA                   | NA                 |
| CA14  | atypic cells            | NA            | NA                   | NA                 |
| CA15  | NA                      | NA            | NA                   | NA                 |
| CA16  | NA                      | EUS           | pancreas             | adenocarcinoma     |
| CA17  | NA                      | US            | tumor                | adenocarcinoma     |
| CA21  | NA                      | NA            | NA                   | NA                 |
| CA22  | NA                      | NA            | NA                   | NA                 |
| CA23  | no malignancy           | NA            | NA                   | NA                 |
| CA24  | no malignancy           | US            | pancreas             | adenocarcinoma     |
| CA25  | NA                      | US            | tumor                | adenocarcinoma     |
| CA26  | inflammation            | NA            | NA                   | NA                 |
| CA27  | inflammation            | NA            | NA                   | NA                 |
| CP01  | NA                      | NA            | NA                   | NA                 |
| CP02  | benign                  | EUS           | pancreas             | inflammation       |
| CP03  | benign                  | NA            | NA                   | NA                 |
| CP04  | benign                  | NA            | NA                   | NA                 |
| CP05  | NA                      | EUS           | pancreas             | benign             |
| CP06  | NA                      | NA            | NA                   | NA                 |
| CP07  | NA                      | NA            | NA                   | NA                 |
| CP08  | NA                      | EUS           | pancreascyste        | inflammatory cells |
| CP09  | NA                      | NA            | NA                   | NA                 |
| CP10  | NA                      | NA            | NA                   | NA                 |

PSC=primary sclerosing cholangitis  
CA=pancreatobiliary malignancy  
CP=chronic pancreatitis  
EUS=endoscopic ultrasound guided  
US=ultrasound guided  
NA=not available/applicable

| HISTOPATHOLOGY 2 |                                     |                |                 |                               |                                                                                       |
|------------------|-------------------------------------|----------------|-----------------|-------------------------------|---------------------------------------------------------------------------------------|
| Histology 1      |                                     |                |                 |                               |                                                                                       |
| ID               | Type                                | Organ          | IgG4+ cells/hpf | Malignancy type               | Description                                                                           |
| PSC01            | biopsy                              | liver          | NA              | NA                            | NA                                                                                    |
| PSC02            | biopsy                              | liver          | NA              | NA                            | mild chronic inflammation, mild fibrosis                                              |
| PSC03            | biopsy                              | liver          | NA              | NA                            | chronic active hepatitis, severe fibrosis                                             |
| PSC04            | NA                                  | NA             | NA              | NA                            | no                                                                                    |
| PSC05            | NA                                  | NA             | NA              | NA                            | NA                                                                                    |
| PSC06            | NA                                  | NA             | NA              | NA                            | NA                                                                                    |
| PSC07            | NA                                  | NA             | NA              | NA                            | NA                                                                                    |
| PSC08            | NA                                  | NA             | NA              | NA                            | NA                                                                                    |
| PSC09            | biopsy                              | colon          | NA              | NA                            | quiescent chronic inflammation                                                        |
| PSC10            | biopsy                              | liver          | NA              | NA                            | NA                                                                                    |
| PSC11            | biopsy                              | liver          | NA              | NA                            | NA                                                                                    |
| PSC12            | NA                                  | NA             | NA              | NA                            | NA                                                                                    |
| PSC13            | biopsy                              | liver          | >30             | NA                            | chronic hepatitis/cholangitis, biliary fibrosis                                       |
| PSC14            | biopsy                              | liver          | 2               | NA                            | inflammation suspect for PSC                                                          |
| PSC15            | biopsy                              | colon          | NA              | NA                            | chronic active colitis                                                                |
| PSC16            | biopsy                              | liver          | NA              | NA                            | small duct PSC                                                                        |
| PSC17            | biopsy                              | liver          | NA              | NA                            | hepatitis, concentric fibrosis bile ducts                                             |
| PSC21            | biopsy                              | duodenum       | 1               | NA                            | benign                                                                                |
| PSC22            | biopsy                              | liver          | NA              | NA                            | septal fibrosis                                                                       |
| PSC23            | biopsy                              | liver          | NA              | NA                            | minimal portal infiltrate, ductular metaplasia and loss of ducts: (small duct) PSC    |
| PSC24            | NA                                  | NA             | NA              | NA                            | NA                                                                                    |
| PSC25            | biopsy                              | liver          | NA              | NA                            | cholangiolitis, septal fibrosis                                                       |
| PSC26            | biopsy                              | liver          | NA              | NA                            | ductular reaction with minimal portal-tract fibrosis                                  |
| PSC27            | biopsy                              | liver          | 3               | NA                            | portal fibrosis, periductal sclerosis, granulomas, chronic inflamm and lymphocytes,   |
| PSC28            | biopsy                              | liver          | 0               | NA                            | periductal sclerosis, mild fibrosis, minimal inflamm                                  |
| PSC29            | NA                                  | NA             | NA              | NA                            | NA                                                                                    |
| PSC30            | biopsy                              | liver          | 1               | NA                            | chronic inflam and portal fibrosis                                                    |
| PSC31            | biopsy                              | liver          | NA              | NA                            | fibrosis of portal tracts and cholestasis                                             |
| PSC32            | biopsy                              | liver          | NA              | NA                            | PSC                                                                                   |
| PSC33            | biopsy                              | colon          | NA              | NA                            | mildly active ulcerative colitis                                                      |
| PSC34            | NA                                  | NA             | NA              | NA                            | NA                                                                                    |
| PSC35            | NA                                  | NA             | NA              | NA                            | NA                                                                                    |
| PSC36            | biopsy                              | liver          | NA              | NA                            | cirrhosis, portal fibrosis                                                            |
| PSC37            | biopsy                              | colon          | NA              | NA                            | chronic granulomas, colitis                                                           |
| PSC38            | biopsy                              | liver          | 0               | NA                            | cirrhosis, portal fibrosis                                                            |
| PSC39            | biopsy                              | colon          | NA              | NA                            | normal                                                                                |
| PSC40            | biopsy                              | gallbladder    | 2               | NA                            | cholecystitis chronic                                                                 |
| PSC41            | biopsy                              | liver          | 3               | NA                            | fibrosis of portal tracts and mild chronic inflamm suggests PSC                       |
| PSC42            | biopsy                              | liver          | 0               | NA                            | periportal fibrosis                                                                   |
| PSC43            | biopsy                              | liver          | 0               | NA                            | portal tract fibrosis                                                                 |
| PSC44            | NA                                  | NA             | NA              | NA                            | NA                                                                                    |
| PSC45            | NA                                  | NA             | NA              | NA                            | NA                                                                                    |
| PSC46            | biopsy                              | liver          | 0               | NA                            | mild steatohepatitis, mild lobulitis, focal with lymphocytes                          |
| PSC47            | biopsy                              | liver          | 5               | NA                            | Chronic inflammatory cells, biliary portal fibrosis 4/6 (total 8/16)                  |
| PSC48            | biopsy                              | liver          | NA              | NA                            | lymphocytes and plasma cells, portal tract fibrosis, mild fibrosis, suggestive of PSC |
| CA01             | resection                           | tumor          | NA              | adenocarcinoma                | NA                                                                                    |
| CA02             | biopsy                              | duodenum       | NA              | adenocarcinoma                | NA                                                                                    |
| CA03             | diagnostic laparotomy               | tumor          | NA              | adenocarcinoma                | NA                                                                                    |
| CA04             | resection                           | tumor          | NA              | IPMN with carcinoma           | NA                                                                                    |
| CA05             | resection                           | papil of Vater | NA              | adenocarcinoma                | NA                                                                                    |
| CA06             | NA                                  | NA             | NA              | NA                            | NA                                                                                    |
| CA07             | obduction                           | tumor          | NA              | adenocarcinoma                | NA                                                                                    |
| CA08             | diagnostic laparotomy (cryosection) | tumor          | NA              | adenocarcinoma                | NA                                                                                    |
| CA09             | diagnostic laparotomy               | tumor          | NA              | squamous carcinoma            | NA                                                                                    |
| CA10             | diagnostic laparotomy (cryosection) | lymph node     | NA              | adenocarcinoma                | NA                                                                                    |
| CA11             | diagnostic laparotomy               | tumor          | NA              | adenocarcinoma                | NA                                                                                    |
| CA12             | resection                           | tumor          | NA              | adenocarcinoma                | NA                                                                                    |
| CA13             | diagnostic laparotomy               | tumor          | NA              | adenocarcinoma papil of Vater | NA                                                                                    |
| CA14             | diagnostic laparotomy               | tumor          | NA              | adenocarcinoma                | NA                                                                                    |
| CA15             | biopsy                              | duodenum       | NA              | adenocarcinoma                | NA                                                                                    |
| CA16             | NA                                  | NA             | NA              | NA                            | NA                                                                                    |
| CA17             | biopsy                              | duodenum       | NA              | no malignancy                 | NA                                                                                    |
| CA21             | diagnostic laparoscopy              | duodenum       | NA              | adenocarcinoma (gall bladder) | NA                                                                                    |
| CA22             | resection                           | lymph node     | NA              | adenocarcinoma                | NA                                                                                    |
| CA23             | diagnostic laparotomy               | lymph node     | NA              | adenocarcinoma                | NA                                                                                    |
| CA24             | biopsy                              | liver          | NA              | adenocarcinoma                | NA                                                                                    |
| CA25             | NA                                  | NA             | NA              | adenocarcinoma                | NA                                                                                    |
| CA26             | diagnostic laparotomy               | tumor          | NA              | adenocarcinoma                | NA                                                                                    |
| CA27             | diagnostic laparotomy               | tumor          | NA              | adenocarcinoma                | NA                                                                                    |
| CP01             | NA                                  | NA             | NA              | NA                            | NA                                                                                    |
| CP02             | biopsy                              | duodenum       | NA              | NA                            | inflammation                                                                          |
| CP03             | biopsy                              | duodenum       | NA              | NA                            | reactive changes                                                                      |
| CP04             | biopsy                              | duodenum       | NA              | NA                            | NA                                                                                    |
| CP05             | tissue from stent removal           | bile duct      | NA              | NA                            | chronic, fibrosing inflammation with focal metaplasia                                 |
| CP06             | resection                           | pancreas       | NA              | NA                            | chronic, fibrosing inflammation with low-grade dysplasia                              |
| CP07             | NA                                  | NA             | NA              | NA                            | NA                                                                                    |
| CP08             | resection                           | pancreas       | NA              | NA                            | chronic, fibrosing inflammation, no dysplasia                                         |
| CP09             | NA                                  | NA             | NA              | NA                            | NA                                                                                    |
| CP10             | NA                                  | NA             | NA              | NA                            | NA                                                                                    |

PSC=primary sclerosing cholangitis  
CA=pancreatobiliary malignancy  
CP=chronic pancreatitis  
IPMN=intraductal papillary mucinous neoplasm  
NA=not available/applicable

| HISTOPATHOLOGY 3<br>Histology 2 |              |              |                    |                                                                      |
|---------------------------------|--------------|--------------|--------------------|----------------------------------------------------------------------|
| ID                              | Type         | Organ        | IgG4+<br>cells/hpf | Description                                                          |
| PSC01                           | NA           | NA           | NA                 | NA                                                                   |
| PSC02                           | biopsy       | colon        | NA                 | no inflammation                                                      |
| PSC03                           | biopsy       | coecum/colon | NA                 | chronic inflammation in quiescent phase                              |
| PSC04                           | NA           | NA           | NA                 | NA                                                                   |
| PSC05                           | NA           | NA           | NA                 | NA                                                                   |
| PSC06                           | NA           | NA           | NA                 | NA                                                                   |
| PSC07                           | NA           | NA           | NA                 | NA                                                                   |
| PSC08                           | NA           | NA           | NA                 | NA                                                                   |
| PSC09                           | NA           | NA           | NA                 | NA                                                                   |
| PSC10                           | NA           | NA           | NA                 | NA                                                                   |
| PSC11                           | NA           | NA           | NA                 | NA                                                                   |
| PSC12                           | NA           | NA           | NA                 | NA                                                                   |
| PSC13                           | biopsy       | colon/coecum | NA                 | active inflammation, eosinophilia                                    |
| PSC14                           | NA           | NA           | NA                 | NA                                                                   |
| PSC15                           | NA           | NA           | NA                 | NA                                                                   |
| PSC16                           | biopsy       | colon        | NA                 | no inflammation                                                      |
| PSC17                           | biopsy       | colon        | NA                 | chronic inflammation                                                 |
| PSC21                           | NA           | NA           | NA                 | NA                                                                   |
| PSC22                           | NA           | NA           | NA                 | NA                                                                   |
| PSC23                           | NA           | NA           | NA                 | NA                                                                   |
| PSC24                           | NA           | NA           | NA                 | NA                                                                   |
| PSC25                           | NA           | NA           | NA                 | NA                                                                   |
| PSC26                           | NA           | NA           | NA                 | NA                                                                   |
| PSC27                           | biopsy       | colon        | 2                  | crohns disease                                                       |
| PSC28                           | biopsy       | colon        | 20                 | mod active pancolitis                                                |
| PSC29                           | NA           | NA           | NA                 | NA                                                                   |
| PSC30                           | biopsy       | colon        | NA                 | mildly active ulcerative colitis                                     |
| PSC31                           | biopsy       | colon        | 0                  | mild active pancolitis                                               |
| PSC32                           | biopsy       | colon        | NA                 | colitis                                                              |
| PSC33                           | NA           | NA           | NA                 | NA                                                                   |
| PSC34                           | NA           | NA           | NA                 | NA                                                                   |
| PSC35                           | NA           | NA           | NA                 | NA                                                                   |
| PSC36                           | biopsy       | colon        | NA                 | mild active pancolitis                                               |
| PSC37                           | NA           | NA           | NA                 | NA                                                                   |
| PSC38                           | biopsy       | colon        | 0                  | normal                                                               |
| PSC39                           | NA           | NA           | NA                 | NA                                                                   |
| PSC40                           | biopsy       | colon        | NA                 | collagenous colitis<br>indefinite colitis, segmental<br>inflammation |
| PSC41                           | biopsy       | colon        | 8                  | normal                                                               |
| PSC42                           | biopsy       | colon        | NA                 | normal                                                               |
| PSC43                           | biopsy       | colon        | 1                  | pancolitis                                                           |
| PSC44                           | NA           | NA           | NA                 | NA                                                                   |
| PSC45                           | NA           | NA           | NA                 | NA                                                                   |
| PSC46                           | biopsy       | colon        | 3                  | chronic proctitis                                                    |
| PSC47                           | biopsy       | colon        | 5                  | mild active chronic proctitis                                        |
| PSC48                           | biopsy       | colon        | 1                  | no inflammation                                                      |
| CA01                            | NA           | NA           | NA                 | NA                                                                   |
| CA02                            | NA           | NA           | NA                 | NA                                                                   |
| CA03                            | NA           | NA           | NA                 | NA                                                                   |
| CA04                            | NA           | NA           | NA                 | NA                                                                   |
| CA05                            | NA           | NA           | NA                 | NA                                                                   |
| CA06                            | NA           | NA           | NA                 | NA                                                                   |
| CA07                            | NA           | NA           | NA                 | NA                                                                   |
| CA08                            | NA           | NA           | NA                 | NA                                                                   |
| CA09                            | NA           | NA           | NA                 | NA                                                                   |
| CA10                            | NA           | NA           | NA                 | NA                                                                   |
| CA11                            | NA           | NA           | NA                 | NA                                                                   |
| CA12                            | NA           | NA           | NA                 | NA                                                                   |
| CA13                            | NA           | NA           | NA                 | NA                                                                   |
| CA14                            | NA           | NA           | NA                 | NA                                                                   |
| CA15                            | NA           | NA           | NA                 | NA                                                                   |
| CA16                            | NA           | NA           | NA                 | NA                                                                   |
| CA17                            | NA           | NA           | NA                 | NA                                                                   |
| CA21                            | NA           | NA           | NA                 | NA                                                                   |
| CA22                            | NA           | NA           | NA                 | NA                                                                   |
| CA23                            | NA           | NA           | NA                 | NA                                                                   |
| CA24                            | NA           | NA           | NA                 | NA                                                                   |
| CA25                            | NA           | NA           | NA                 | NA                                                                   |
| CA26                            | NA           | NA           | NA                 | NA                                                                   |
| CA27                            | NA           | NA           | NA                 | NA                                                                   |
| CP01                            | NA           | NA           | NA                 | NA                                                                   |
| CP02                            | NA           | NA           | NA                 | NA                                                                   |
| CP03                            | gall bladder | NA           | NA                 | chronic active inflammation                                          |
| CP04                            | NA           | NA           | NA                 | NA                                                                   |
| CP05                            | NA           | NA           | NA                 | NA                                                                   |
| CP06                            | NA           | NA           | NA                 | NA                                                                   |
| CP07                            | NA           | NA           | NA                 | NA                                                                   |
| CP08                            | NA           | NA           | NA                 | NA                                                                   |
| CP09                            | NA           | NA           | NA                 | NA                                                                   |
| CP10                            | NA           | NA           | NA                 | NA                                                                   |

PSC=primary sclerosing cholangitis  
CA=pancreatobiliary malignancy  
CP=chronic pancreatitis  
NA=not available/applicable

| ID    | TREATMENT 1     |                       |                                                                   |
|-------|-----------------|-----------------------|-------------------------------------------------------------------|
|       | Biliary stents? | Resection/palliation? | Resection type                                                    |
| PSC01 | yes             | NA                    | NA                                                                |
| PSC02 | NA              | NA                    | NA                                                                |
| PSC03 | NA              | NA                    | NA                                                                |
| PSC04 | NA              | NA                    | NA                                                                |
| PSC05 | no              | NA                    | NA                                                                |
| PSC06 | no              | NA                    | NA                                                                |
| PSC07 | no              | NA                    | NA                                                                |
| PSC08 | no              | NA                    | NA                                                                |
| PSC09 | NA              | NA                    | NA                                                                |
| PSC10 | no              | NA                    | NA                                                                |
| PSC11 | yes             | NA                    | NA                                                                |
| PSC12 | no              | NA                    | NA                                                                |
| PSC13 | NA              | NA                    | NA                                                                |
| PSC14 | no              | NA                    | NA                                                                |
| PSC15 | NA              | NA                    | NA                                                                |
| PSC16 | NA              | NA                    | NA                                                                |
| PSC17 | NA              | NA                    | NA                                                                |
| PSC21 | yes             | NA                    | NA                                                                |
| PSC22 | no              | NA                    | NA                                                                |
| PSC23 | no              | NA                    | NA                                                                |
| PSC24 | yes             | NA                    | NA                                                                |
| PSC25 | no              | NA                    | NA                                                                |
| PSC26 | no              | NA                    | NA                                                                |
| PSC27 | yes             | NA                    | NA                                                                |
| PSC28 | no              | NA                    | NA                                                                |
| PSC29 | no              | NA                    | NA                                                                |
| PSC30 | no              | NA                    | NA                                                                |
| PSC31 | yes             | NA                    | NA                                                                |
| PSC32 | no              | NA                    | NA                                                                |
| PSC33 | no              | NA                    | NA                                                                |
| PSC34 | NA              | NA                    | NA                                                                |
| PSC35 | no              | NA                    | NA                                                                |
| PSC36 | no              | NA                    | NA                                                                |
| PSC37 | no              | NA                    | NA                                                                |
| PSC38 | no              | NA                    | NA                                                                |
| PSC39 | no              | NA                    | NA                                                                |
| PSC40 | yes             | NA                    | NA                                                                |
| PSC41 | no              | NA                    | NA                                                                |
| PSC42 | no              | NA                    | NA                                                                |
| PSC43 | no              | NA                    | NA                                                                |
| PSC44 | NA              | NA                    | NA                                                                |
| PSC45 | NA              | NA                    | NA                                                                |
| PSC46 | yes             | NA                    | NA                                                                |
| PSC47 | no              | NA                    | NA                                                                |
| PSC48 | no              | NA                    | NA                                                                |
| CA01  | no              | resection             | hilar resection + extended hemihepatectomy                        |
| CA02  | no              | palliation            | 7777                                                              |
| CA03  | no              | palliation            | 7777                                                              |
| CA04  | yes             | resection             | hilar resection + extended hemihepatectomy                        |
| CA05  | no              | resection             | PPPD                                                              |
| CA06  | yes             | palliation            | 7777                                                              |
| CA07  | yes             | resection             | hilar resection + extended hemihepatectomy                        |
| CA08  | yes             | palliation            | 7777                                                              |
| CA09  | yes             | palliation            | 7777                                                              |
| CA10  | yes             | palliation            | 7777                                                              |
| CA11  | no              | palliation            | 7777                                                              |
| CA12  | no              | resection             | PPPD                                                              |
| CA13  | no              | palliation            | 7777                                                              |
| CA14  | yes             | palliation            | 7777                                                              |
| CA15  | no              | palliation            | 7777                                                              |
| CA16  | no              | palliation            | 7777                                                              |
| CA17  | no              | palliation            | 7777                                                              |
| CA21  | yes             | palliation            | 7777                                                              |
| CA22  | yes             | resection             | hilar resection + extended hemihepatectomy                        |
| CA23  | yes             | palliation            | 7777                                                              |
| CA24  | yes             | palliation            | 7777                                                              |
| CA25  | yes             | palliation            | 7777                                                              |
| CA26  | yes             | palliation            | NA                                                                |
| CA27  | no              | palliation            | NA                                                                |
| CP01  | no              | NA                    | NA                                                                |
| CP02  | yes             | NA                    | NA                                                                |
| CP03  | no              | NA                    | pancreaticojejunostomy + choledochoduodenostomy + cholecystectomy |
| CP04  | no              | NA                    | 7777                                                              |
| CP05  | yes             | NA                    | NA                                                                |
| CP06  | no              | NA                    | pancreatosplenectomy                                              |
| CP07  | no              | NA                    | NA                                                                |
| CP08  | no              | NA                    | frey procedure + choledochoduodenostomy                           |
| CP09  | no              | NA                    | NA                                                                |
| CP10  | no              | NA                    | NA                                                                |

PSC=primary sclerosing cholangitis  
CA=pancreatobiliary malignancy  
CP=chronic pancreatitis  
PPPD=pylorus sparing  
pancreaticoduodenectomy  
NA=not available/applicable
